# Supplementary material for: Octopamine Shifts the Behavioral Response From Indecision to Approach or Aversion in Drosophila melanogaster
Source: Front Behav Neurosci. 2018 Jul 3;12:131. doi: 10.3389/fnbeh.2018.00131 (PMC6037846; doi:10.3389/fnbeh.2018.00131)
Supplement: TABLE S2 — Data for Figure 2. [file Table_2.XLSX]

## Sheet: Figure 2A left
6.2-Tbh-GAL4/UAS-ChR2 1200lux 2s 40Hz 16s 8Hz 2s 0Hz
genotype 1	date	# out	%out	Yellow light	% yellow	Blue light	% blue	total	Index	total - #out	genotype 2	date	# out	%out	Yellow light	% yellow	Blue light	% blue	total	Index	total - #out
Control	2014-09-19	2	0.025974	10	0.12987	65	0.844156	77	0.733333	75	Retinal	2014-09-19	1	0.0126582	8	0.101266	70	0.886076	79	0.794872	78
Control	2014-09-19	0	0	20	0.25641	58	0.74359	78	0.487179	78	Retinal	2014-09-19	0	0	77	0.974684	2	0.0253165	79	-0.949367	79
Control	2014-09-19	0	0	44	0.556962	35	0.443038	79	-0.113924	79	Retinal	2014-09-19	0	0	14	0.175	66	0.825	80	0.65	80
Control	2014-09-19	0	0	71	0.910256	7	0.0897436	78	-0.820513	78	Retinal	2014-09-19	0	0	79	0.9875	1	0.0125	80	-0.975	80
Control	2014-09-22	1	0.0128205	3	0.0384615	74	0.948718	78	0.922078	77	Retinal	2014-09-22	0	0	64	0.820513	14	0.179487	78	-0.641026	78
Control	2014-09-22	0	0	44	0.556962	35	0.443038	79	-0.113924	79	Retinal	2014-09-22	0	0	78	0.975	2	0.025	80	-0.95	80
Control	2014-09-22	0	0	78	0.962963	3	0.037037	81	-0.925926	81	Retinal	2014-09-29	1	0.0136986	65	0.890411	7	0.0958904	73	-0.805556	72
Control	2014-09-29	1	0.012987	36	0.467532	40	0.519481	77	0.0526316	76	Retinal	2014-10-02	1	0.0128205	47	0.602564	30	0.384615	78	-0.220779	77
Control	2014-09-29	3	0.0379747	63	0.797468	13	0.164557	79	-0.657895	76	Retinal	2014-10-02	0	0	47	0.580247	34	0.419753	81	-0.160494	81
Control	2014-09-29	0	0	52	0.693333	23	0.306667	75	-0.386667	75	Retinal	2014-10-02	2	0.0246914	68	0.839506	11	0.135802	81	-0.721519	79
Control	2014-09-29	1	0.0133333	24	0.32	50	0.666667	75	0.351351	74	Retinal	2014-10-02	0	0	70	0.921053	6	0.0789474	76	-0.842105	76
Control	2014-10-02	0	0	64	0.853333	11	0.146667	75	-0.706667	75	Retinal	2014-10-06	0	0	73	0.924051	6	0.0759494	79	-0.848101	79
Control	2014-10-02	0	0	13	0.1625	67	0.8375	80	0.675	80	Retinal	2014-10-06	0	0	60	0.769231	18	0.230769	78	-0.538462	78
Control	2014-10-02	1	0.0131579	63	0.828947	12	0.157895	76	-0.68	75	Retinal	2014-10-06	0	0	67	0.8375	13	0.1625	80	-0.675	80
Control	2014-10-02	4	0.0526316	10	0.131579	62	0.815789	76	0.722222	72	Retinal	2014-10-06	2	0.025641	35	0.448718	41	0.525641	78	0.0789474	76
Control	2014-10-02	1	0.0131579	57	0.75	18	0.236842	76	-0.52	75	Retinal	2014-10-09	3	0.04	31	0.413333	41	0.546667	75	0.138889	72
Control	2014-10-06	0	0	4	0.0512821	74	0.948718	78	0.897436	78	Retinal	2014-10-09	0	0	40	0.526316	36	0.473684	76	-0.0526316	76
Control	2014-10-06	2	0.025	64	0.8	14	0.175	80	-0.641026	78	Retinal	2014-10-09	0	0	77	0.9625	3	0.0375	80	-0.925	80
Control	2014-10-06	0	0	27	0.355263	49	0.644737	76	0.289474	76	Retinal	2014-10-09	1	0.0125	45	0.5625	34	0.425	80	-0.139241	79
Control	2014-10-09	0	0	24	0.296296	57	0.703704	81	0.407407	81	Retinal
Control	2014-10-09	0	0	64	0.831169	13	0.168831	77	-0.662338	77	Retinal
Control	2014-10-09	0	0	33	0.402439	49	0.597561	82	0.195122	82	Retinal
Mean									-0.0225292											-0.409556
Stde									0.618428											0.545383
s.e.m.									0.131849											0.125119
n									22											19
	Genotype	Mean	Stde	s.e.m.	n
	Control	-0.0225292	0.618428	0.131849	22
	Retinal	-0.409556	0.545383	0.125119	19
		T-test
		0.0413836
	Control group significantly different from zero
	Experimental group significantly different from zero

## Sheet: Figure 2A right
TH-GAL80; 6.2-Tbh-GAL4/UAS-ChR2 1200lux 2s 40Hz 16s 8Hz 2s 0Hz
genotype 1	date	# out	%out	Yellow light	% yellow	Blue light	% blue	total	Index	total - #out	genotype 2	date	# out	%out	Yellow light	% yellow	Blue light	% blue	total	Index	total - #out
Control	2017-10-16	0	0	36	0.679245	17	0.320755	53	-0.358491	53	Retinal	2017-10-16	0	0	42	0.857143	7	0.142857	49	-0.714286	49
Control	2017-10-16	0	0	16	0.301887	37	0.698113	53	0.396226	53	Retinal	2017-10-16	1	0.0192308	32	0.615385	19	0.365385	52	-0.254902	51
Control	2017-10-17	5	0.1	23	0.46	22	0.44	50	-0.0222222	45	Retinal	2017-10-17	2	0.04	41	0.82	7	0.14	50	-0.708333	48
Control	2017-10-17	1	0.02	17	0.34	32	0.64	50	0.306122	49	Retinal	2017-10-17	5	0.0943396	39	0.735849	9	0.169811	53	-0.625	48
Control	2017-10-19	4	0.0769231	22	0.423077	26	0.5	52	0.0833333	48	Retinal	2017-10-19	5	0.1	43	0.86	2	0.04	50	-0.911111	45
Control	2017-10-19	5	0.1	39	0.78	6	0.12	50	-0.733333	45	Retinal	2017-10-23	0	0	46	0.901961	5	0.0980392	51	-0.803922	51
Control	2017-10-23	1	0.0172414	30	0.517241	27	0.465517	58	-0.0526316	57	Retinal	2017-11-03	1	0.0217391	2	0.0434783	43	0.934783	46	0.911111	45
Control	2017-10-23	0	0	29	0.557692	23	0.442308	52	-0.115385	52	Retinal	2017-11-03	0	0	31	0.645833	17	0.354167	48	-0.291667	48
Control	2017-10-23	0	0	36	0.679245	17	0.320755	53	-0.358491	53	Retinal	2017-11-03	0	0	38	0.77551	11	0.22449	49	-0.55102	49
Control	2017-11-03	2	0.0434783	36	0.782609	8	0.173913	46	-0.636364	44	Retinal	2017-11-07	0	0	30	0.625	18	0.375	48	-0.25	48
Control	2017-11-03	1	0.0217391	10	0.217391	35	0.76087	46	0.555556	45	Retinal	2017-11-07	0	0	45	0.9375	3	0.0625	48	-0.875	48
Control	2017-11-03	0	0	31	0.632653	18	0.367347	49	-0.265306	49	Retinal	2017-11-07	0	0	25	0.480769	27	0.519231	52	0.0384615	52
Control	2017-11-07	0	0	44	0.88	6	0.12	50	-0.76	50	Retinal	2017-11-07	0	0	44	0.916667	4	0.0833333	48	-0.833333	48
Control	2017-11-07	0	0	12	0.244898	37	0.755102	49	0.510204	49	Retinal	2017-11-07	0	0	49	1	0	0	49	-1	49
Mean									-0.103627											-0.490643
Stde									0.442075											0.505096
s.e.m.									0.118149											0.134993
n									14											14
	Genotype	Mean	Stde	s.e.m.	n
	Control	-0.103627	0.442075	0.118149	14
	Retinal	-0.490643	0.505096	0.134993	14
		T-test
		0.0403989
	Control group significantly different from zero
	Experimental group significantly different from zero

## Sheet: Figure 2B
TbhnM18; 6.2-Tbh-GAL4/UAS-ChR2 1200lux 2s 40Hz 16s 8Hz 2s 0Hz
genotype 1	date	# out	%out	Yellow light	% yellow	Blue light	% blue	total	Index	total - #out	genotype 2	date	# out	%out	Yellow light	% yellow	Blue light	% blue	total	Index	total - #out
Control	2017-12-15	0	0	43	0.843137	8	0.156863	51	-0.686275	51	Retinal	2017-12-15	0	0	37	0.822222	8	0.177778	45	-0.644444	45
Control	2017-12-15	0	0	21	0.428571	28	0.571429	49	0.142857	49	Retinal	2017-12-15	0	0	30	0.638298	17	0.361702	47	-0.276596	47
Control	2017-12-15	0	0	25	0.5	25	0.5	50	0	50	Retinal	2017-12-15	0	0	23	0.442308	29	0.557692	52	0.115385	52
Control	2017-12-15	0	0	33	0.673469	16	0.326531	49	-0.346939	49	Retinal	2017-12-15	0	0	13	0.270833	35	0.729167	48	0.458333	48
Control	2017-12-18	0	0	37	0.787234	10	0.212766	47	-0.574468	47	Retinal	2017-12-18	0	0	38	0.791667	10	0.208333	48	-0.583333	48
Control	2017-12-21	0	0	37	0.804348	9	0.195652	46	-0.608696	46	Retinal	2017-12-18	0	0	17	0.369565	29	0.630435	46	0.26087	46
Control	2017-12-21	1	0.0192308	3	0.0576923	48	0.923077	52	0.882353	51	Retinal	2017-12-21	1	0.0169492	48	0.813559	10	0.169492	59	-0.655172	58
Control	2017-12-21	0	0	15	0.294118	36	0.705882	51	0.411765	51	Retinal	2017-12-21	0	0	20	0.4	30	0.6	50	0.2	50
Control	2017-12-29	0	0	39	0.8125	9	0.1875	48	-0.625	48	Retinal	2017-12-21	0	0	20	0.434783	26	0.565217	46	0.130435	46
Control	2017-12-29	0	0	22	0.468085	25	0.531915	47	0.0638298	47	Retinal	2017-12-29	0	0	32	0.666667	16	0.333333	48	-0.333333	48
Control	2017-12-29	0	0	40	0.816327	9	0.183673	49	-0.632653	49	Retinal	2017-12-29	0	0	34	0.68	16	0.32	50	-0.36	50
Control	2017-12-29	0	0	22	0.431373	29	0.568627	51	0.137255	51	Retinal	2018-01-02	0	0	21	0.466667	24	0.533333	45	0.0666667	45
Control	2018-01-02	0	0	31	0.607843	20	0.392157	51	-0.215686	51	Retinal	2018-01-02	0	0	30	0.612245	19	0.387755	49	-0.22449	49
Control	2018-01-02	0	0	38	0.76	12	0.24	50	-0.52	50	Retinal	2018-01-02	0	0	42	0.807692	10	0.192308	52	-0.615385	52
Control	2018-01-02	0	0	23	0.442308	29	0.557692	52	0.115385	52	Retinal	2018-01-02	0	0	36	0.705882	15	0.294118	51	-0.411765	51
Control	2018-01-02	0	0	18	0.367347	31	0.632653	49	0.265306	49	Retinal	2018-01-03	5	0.1	28	0.56	17	0.34	50	-0.244444	45
Control	2018-01-03	0	0	37	0.770833	11	0.229167	48	-0.541667	48	Retinal	2018-01-03	2	0.04	23	0.46	25	0.5	50	0.0416667	48
Control	2018-01-03	4	0.08	27	0.54	19	0.38	50	-0.173913	46	Retinal	2018-01-03	3	0.06	39	0.78	8	0.16	50	-0.659574	47
Control	2018-01-03	1	0.0212766	24	0.510638	22	0.468085	47	-0.0434783	46	Retinal	2018-01-03	1	0.0212766	20	0.425532	26	0.553191	47	0.130435	46
Control	2018-01-03	4	0.08	34	0.68	12	0.24	50	-0.478261	46	Retinal
Mean									-0.171414											-0.189724
Stde									0.425589											0.356154
s.e.m.									0.0951646											0.0817074
n									20											19
	Genotype	Mean	Stde	s.e.m.	n
	Control	-0.171414	0.425589	0.0951646	20
	Retinal	-0.189724	0.356154	0.0817074	19
		T-test
		0.885265
	Control group significantly different from zero
	Experimental group significantly different from zero

## Sheet: Figure 2c
TbhnM18; 6.2-Tbh-GAL4/UAS-ChR2 1200lux 2s 40Hz 16s 8Hz 2s 0Hz
genotype 1	date	# out	%out	Yellow light	% yellow	Blue light	% blue	total	Index	total - #out	genotype 2	date	# out	%out	Yellow light	% yellow	Blue light	% blue	total	Index	total - #out
Control	2018-03-28	1	0.0217391	27	0.586957	18	0.391304	46	-0.2	45	Retinal	2018-03-28	1	0.0217391	26	0.565217	19	0.413043	46	-0.155556	45
Control	2018-03-28	0	0	0	0	45	1	45	1	45	Retinal	2018-03-28	0	0	31	0.688889	14	0.311111	45	-0.377778	45
Control	2018-04-04	0	0	39	0.866667	6	0.133333	45	-0.733333	45	Retinal	2018-04-04	0	0	5	0.104167	43	0.895833	48	0.791667	48
Control	2018-04-04	0	0	27	0.6	18	0.4	45	-0.2	45	Retinal	2018-04-04	0	0	45	1	0	0	45	-1	45
Control	2018-04-04	0	0	33	0.6875	15	0.3125	48	-0.375	48	Retinal	2018-04-04	0	0	3	0.0576923	49	0.942308	52	0.884615	52
Control	2018-04-04	0	0	45	1	0	0	45	-1	45	Retinal	2018-04-06	0	0	20	0.444444	25	0.555556	45	0.111111	45
Control	2018-04-04	0	0	9	0.2	36	0.8	45	0.6	45	Retinal	2018-04-06	0	0	21	0.466667	24	0.533333	45	0.0666667	45
Control	2018-04-06	0	0	46	0.884615	6	0.115385	52	-0.769231	52	Retinal	2018-04-13	0	0	45	0.9	5	0.1	50	-0.8	50
Control	2018-04-06	0	0	12	0.24	38	0.76	50	0.52	50	Retinal	2018-04-13	0	0	2	0.0444444	43	0.955556	45	0.911111	45
Control	2018-04-13	0	0	42	0.893617	5	0.106383	47	-0.787234	47	Retinal	2018-04-13	0	0	36	0.75	12	0.25	48	-0.5	48
Control	2018-04-13	1	0.02	21	0.42	28	0.56	50	0.142857	49	Retinal	2018-04-13	0	0	42	0.893617	5	0.106383	47	-0.787234	47
Control	2018-04-13	0	0	33	0.702128	14	0.297872	47	-0.404255	47	Retinal
Control	2018-04-13	0	0	14	0.304348	32	0.695652	46	0.391304	46	Retinal
Mean									-0.139607											-0.0777633
Stde									0.624756											0.697591
s.e.m.									0.173276											0.210331
n									13											11
	Genotype	Mean	Stde	s.e.m.	n
	Control	-0.139607	0.624756	0.173276	13
	Retinal	-0.0777633	0.697591	0.210331	11
		T-test
		0.820892
	Control group significantly different from zero
	Experimental group significantly different from zero
