# Supplementary material for: Octopamine Shifts the Behavioral Response From Indecision to Approach or Aversion in Drosophila melanogaster
Source: Front Behav Neurosci. 2018 Jul 3;12:131. doi: 10.3389/fnbeh.2018.00131 (PMC6037846; doi:10.3389/fnbeh.2018.00131)
Supplement: TABLE S5 — Data for Figure 5. [file Table_5.XLS]

## Sheet: Figure 5A
w1118 and Tbh nM18 non-fed and pre-fed with octopamine
Date	Fly line	# out	%out	%out	juice	% juice	EtOH	5% EtOH	total	Index		Date	Fly line	# out	%out	juice	% juice	EtOH	5% EtOH	total	Index		Date	Fly line	# out	%out	juice	% juice	EtOH	5% EtOH	total	Index		Date	Fly line	# out	%out	juice	% juice	EtOH	5% EtOH	total	Index
2016-11-07	w1118	2	0.037037	0.037037	8	0.148148	44	0.814815	54	0.692308		2016-11-07	w1118 + octopamine	1	0.0188679	21	0.396226	31	0.584906	53	0.192308		2016-11-07	w1118, TbHnM18	1	0.0192308	12	0.230769	39	0.75	52	0.529412		2016-11-07	w1118, TbHnM18 + octopamine	5	0.1	13	0.26	32	0.64	50	0.422222
2016-11-07	w1118	1	0.0181818	0.0181818	21	0.381818	33	0.6	55	0.222222		2016-11-07	w1118 + octopamine	0	0	14	0.269231	38	0.730769	52	0.461538		2016-11-07	w1118, TbHnM18	4	0.0727273	6	0.109091	45	0.818182	55	0.764706		2016-11-08	w1118, TbHnM18 + octopamine	4	0.0727273	23	0.418182	28	0.509091	55	0.0980392
2016-11-07	w1118	1	0.0185185	0.0185185	24	0.444444	29	0.537037	54	0.0943396		2016-11-07	w1118 + octopamine	1	0.0181818	7	0.127273	47	0.854545	55	0.740741		2016-11-07	w1118, TbHnM18	5	0.0943396	28	0.528302	20	0.377358	53	-0.166667		2016-11-08	w1118, TbHnM18 + octopamine	4	0.0769231	10	0.192308	38	0.730769	52	0.583333
2016-11-07	w1118	4	0.0740741	0.0740741	27	0.5	23	0.425926	54	-0.08		2016-11-07	w1118 + octopamine	0	0	2	0.037037	52	0.962963	54	0.925926		2016-11-08	w1118, TbHnM18	2	0.0344828	11	0.189655	45	0.775862	58	0.607143		2016-11-10	w1118, TbHnM18 + octopamine	5	0.0980392	1	0.0196078	45	0.882353	51	0.956522
2016-11-07	w1118	0	0	0	21	0.396226	32	0.603774	53	0.207547		2016-11-08	w1118 + octopamine	3	0.0588235	8	0.156863	40	0.784314	51	0.666667		2016-11-08	w1118, TbHnM18	5	0.0980392	12	0.235294	34	0.666667	51	0.478261		2016-11-15	w1118, TbHnM18 + octopamine	0	0	19	0.358491	34	0.641509	53	0.283019
2016-11-08	w1118	1	0.0181818	0.0181818	30	0.545455	24	0.436364	55	-0.111111		2016-11-15	w1118 + octopamine	5	0.0943396	32	0.603774	16	0.301887	53	-0.333333		2016-11-08	w1118, TbHnM18	5	0.0925926	24	0.444444	25	0.462963	54	0.0204082		2016-11-15	w1118, TbHnM18 + octopamine	5	0.102041	21	0.428571	23	0.469388	49	0.0454545
2016-11-08	w1118	2	0.0377358	0.0377358	13	0.245283	38	0.716981	53	0.490196		2016-11-15	w1118 + octopamine	5	0.1	9	0.18	36	0.72	50	0.6		2016-11-15	w1118, TbHnM18	5	0.0961538	25	0.480769	22	0.423077	52	-0.0638298		2016-12-01	w1118, TbHnM18 + octopamine	5	0.0980392	25	0.490196	21	0.411765	51	-0.0869565
2016-11-08	w1118	1	0.0181818	0.0181818	9	0.163636	45	0.818182	55	0.666667		2016-12-01	w1118 + octopamine	4	0.0754717	26	0.490566	23	0.433962	53	-0.0612245		2016-11-15	w1118, TbHnM18	5	0.0980392	31	0.607843	15	0.294118	51	-0.347826		2016-12-01	w1118, TbHnM18 + octopamine	3	0.0555556	17	0.314815	34	0.62963	54	0.333333
2016-11-10	w1118	2	0.0425532	0.0425532	9	0.191489	36	0.765957	47	0.6		2016-12-01	w1118 + octopamine	0	0	6	0.111111	48	0.888889	54	0.777778		2016-12-01	w1118, TbHnM18	4	0.0769231	7	0.134615	41	0.788462	52	0.708333		2016-12-01	w1118, TbHnM18 + octopamine	3	0.0545455	19	0.345455	33	0.6	55	0.269231
2016-11-15	w1118	5	0.0980392	0.0980392	16	0.313725	30	0.588235	51	0.304348		2016-12-01	w1118 + octopamine	1	0.0178571	13	0.232143	42	0.75	56	0.527273		2016-12-01	w1118, TbHnM18	3	0.0566038	19	0.358491	31	0.584906	53	0.24		2016-12-01	w1118, TbHnM18 + octopamine	5	0.1	23	0.46	22	0.44	50	-0.0222222
2016-11-15	w1118	5	0.0943396	0.0943396	10	0.188679	38	0.716981	53	0.583333		2016-12-01	w1118 + octopamine	5	0.0961538	32	0.615385	15	0.288462	52	-0.361702		2016-12-01	w1118, TbHnM18	5	0.0909091	26	0.472727	24	0.436364	55	-0.04		2016-12-01	w1118, TbHnM18 + octopamine	3	0.0588235	9	0.176471	39	0.764706	51	0.625
2016-11-15	w1118	1	0.0188679	0.0188679	7	0.132075	45	0.849057	53	0.730769		2016-12-01	w1118 + octopamine	1	0.0185185	1	0.0185185	52	0.962963	54	0.962264		2016-12-01	w1118, TbHnM18	3	0.0545455	28	0.509091	24	0.436364	55	-0.0769231		2016-12-01	w1118, TbHnM18 + octopamine	3	0.0555556	7	0.12963	44	0.814815	54	0.72549
2016-12-01	w1118	1	0.0181818	0.0181818	13	0.236364	41	0.745455	55	0.518519		2016-12-01	w1118 + octopamine	3	0.0555556	3	0.0555556	48	0.888889	54	0.882353		2016-12-01	w1118, TbHnM18	5	0.0892857	33	0.589286	18	0.321429	56	-0.294118		2016-12-01	w1118, TbHnM18 + octopamine	4	0.0740741	17	0.314815	33	0.611111	54	0.32
2016-12-01	w1118	2	0.0363636	0.0363636	16	0.290909	37	0.672727	55	0.396226		2016-12-01	w1118 + octopamine	4	0.0784314	5	0.0980392	42	0.823529	51	0.787234		2016-12-01	w1118, TbHnM18	3	0.0576923	35	0.673077	14	0.269231	52	-0.428571		2016-12-01	w1118, TbHnM18 + octopamine	4	0.0714286	30	0.535714	22	0.392857	56	-0.153846
2016-12-01	w1118	4	0.0727273	0.0727273	11	0.2	40	0.727273	55	0.568627		2016-12-05	w1118 + octopamine	1	0.0185185	8	0.148148	45	0.833333	54	0.698113		2016-12-05	w1118, TbHnM18	5	0.0980392	28	0.54902	18	0.352941	51	-0.217391		2016-12-05	w1118, TbHnM18 + octopamine	5	0.0961538	16	0.307692	31	0.596154	52	0.319149
2016-12-01	w1118	3	0.0566038	0.0566038	24	0.45283	26	0.490566	53	0.04		2016-12-05	w1118 + octopamine	1	0.0185185	13	0.240741	40	0.740741	54	0.509434		2016-12-05	w1118, TbHnM18	2	0.0363636	18	0.327273	35	0.636364	55	0.320755		2016-12-05	w1118, TbHnM18 + octopamine	1	0.0175439	22	0.385965	34	0.596491	57	0.214286
2016-12-01	w1118	1	0.0188679	0.0188679	17	0.320755	35	0.660377	53	0.346154		2016-12-08	w1118 + octopamine	3	0.0588235	33	0.647059	15	0.294118	51	-0.375		2016-12-08	w1118, TbHnM18	5	0.0943396	30	0.566038	18	0.339623	53	-0.25		2016-12-05	w1118, TbHnM18 + octopamine	5	0.0909091	22	0.4	28	0.509091	55	0.12
2016-12-01	w1118	4	0.0816327	0.0816327	14	0.285714	31	0.632653	49	0.377778		2016-12-08	w1118 + octopamine	1	0.0185185	14	0.259259	39	0.722222	54	0.471698		2016-12-08	w1118, TbHnM18	4	0.0714286	50	0.892857	2	0.0357143	56	-0.923077		2016-12-05	w1118, TbHnM18 + octopamine	0	0	4	0.0727273	51	0.927273	55	0.854545
2016-12-01	w1118	5	0.0980392	0.0980392	20	0.392157	26	0.509804	51	0.130435		2016-12-08	w1118 + octopamine	4	0.08	1	0.02	45	0.9	50	0.956522		2016-12-08	w1118, TbHnM18	5	0.0909091	18	0.327273	32	0.581818	55	0.28		2016-12-08	w1118, TbHnM18 + octopamine	4	0.0727273	9	0.163636	42	0.763636	55	0.647059
2016-12-05	w1118	1	0.0185185	0.0185185	24	0.444444	29	0.537037	54	0.0943396		2016-12-08	w1118 + octopamine	4	0.0714286	38	0.678571	14	0.25	56	-0.461538													2016-12-08	w1118, TbHnM18 + octopamine	5	0.0980392	13	0.254902	33	0.647059	51	0.434783
2016-12-05	w1118	4	0.0754717	0.0754717	9	0.169811	40	0.754717	53	0.632653		2016-12-08	w1118 + octopamine	4	0.0754717	2	0.0377358	47	0.886792	53	0.918367													2016-12-08	w1118, TbHnM18 + octopamine	4	0.0740741	7	0.12963	43	0.796296	54	0.72
2016-12-05	w1118	4	0.0727273	0.0727273	7	0.127273	44	0.8	55	0.72549																								2016-12-08	w1118, TbHnM18 + octopamine	5	0.1	3	0.06	42	0.84	50	0.866667
2016-12-08	w1118	4	0.0754717	0.0754717	7	0.132075	42	0.792453	53	0.714286
2016-12-08	w1118	5	0.1	0.1	9	0.18	36	0.72	50	0.6
2016-12-08	w1118	5	0.1	0.1	11	0.22	34	0.68	50	0.511111
																								w1118 non-fed significantly different from zero
													Genotype	Mittelwert	Stabw	Sterror	n
													w1118	0.402249	0.26325	0.05265	25
													w1118 + octopamine	0.451687	0.485298	0.105901	21
													w1118, TbHnM18	0.0600324	0.442677	0.101557	19
													w1118, TbHnM18 + octopamine	0.389778	0.322727	0.0688057	22
													ANOVA post hoc Tukey											w1118 fed significantly different from zero
													w1118		0.971841	0.0213955	0.999562
													w1118 + octopamine	0.971841		0.00921155	0.951176
													w1118, TbHnM18	0.0213955	0.00921155		0.0353582
													w1118, TbHnM18 + octopamine	0.999562	0.951176	0.0353582
																								TbhnM18 non-fed significantly different from zero
																								TbhnM18 fed significantly different from zero

## Sheet: Figure 5B
w1118 and Tbh nM18 non-fed and pre-fed with epinastine
Date	Fly line	# out	%out	%out	juice	% juice	EtOH	5% EtOH	total	Index		Date	Fly line	# out	%out	juice	% juice	EtOH	5% EtOH	total	Index		Date	Fly line	# out	%out	juice	% juice	EtOH	5% EtOH	total	Index
2016-02-10	w1118	1	0.0185185	0.0185185	33	0.611111	20	0.37037	54	-0.245283		2016-02-10	w1118 + epinastine	5	0.0980392	40	0.784314	6	0.117647	51	-0.73913		2016-02-10	w1118, TbHnM18	5	0.1	21	0.42	24	0.48	50	0.0666667
2016-02-10	w1118	3	0.0576923	0.0576923	21	0.403846	28	0.538462	52	0.142857		2016-02-10	w1118 + epinastine	5	0.0980392	12	0.235294	34	0.666667	51	0.478261		2016-02-10	w1118, TbHnM18	5	0.1	30	0.6	15	0.3	50	-0.333333
2016-02-10	w1118	5		0.1	4	0.08	41	0.82	50	0.822222		2016-02-10	w1118 + epinastine	5	0.1	35	0.7	10	0.2	50	-0.555556		2016-02-10	w1118, TbHnM18	5	0.0943396	33	0.622642	15	0.283019	53	-0.375
2016-02-10	w1118	1	0.0196078	0.0196078	15	0.294118	35	0.686275	51	0.4		2016-02-10	w1118 + epinastine	5	0.0980392	6	0.117647	40	0.784314	51	0.73913		2016-02-15	w1118, TbHnM18	5	0.1	38	0.76	7	0.14	50	-0.688889
2016-02-10	w1118	2	0.0363636	0.0363636	4	0.0727273	49	0.890909	55	0.849057		2016-02-10	w1118 + epinastine	5	0.1	5	0.1	40	0.8	50	0.777778		2016-02-15	w1118, TbHnM18	5	0.0943396	0	0	48	0.90566	53	1
2016-02-10	w1118	4	0.0769231	0.0769231	30	0.576923	18	0.346154	52	-0.25		2016-02-10	w1118 + epinastine	5	0.0980392	42	0.823529	4	0.0784314	51	-0.826087		2016-02-15	w1118, TbHnM18	2	0.0377358	29	0.54717	22	0.415094	53	-0.137255
2016-02-10	w1118	1	0.0188679	0.0188679	25	0.471698	27	0.509434	53	0.0384615		2016-02-15	w1118 + epinastine	3	0.0588235	43	0.843137	5	0.0980392	51	-0.791667		2016-02-15	w1118, TbHnM18	5	0.1	2	0.04	43	0.86	50	0.911111
2016-02-10	w1118	1	0.0192308	0.0192308	26	0.5	25	0.480769	52	-0.0196078		2016-02-15	w1118 + epinastine	5	0.1	30	0.6	15	0.3	50	-0.333333		2016-02-18	w1118, TbHnM18	5	0.1	24	0.48	21	0.42	50	-0.0666667
2016-02-10	w1118	2	0.0377358	0.0377358	8	0.150943	43	0.811321	53	0.686275		2016-02-15	w1118 + epinastine	5	0.0961538	18	0.346154	29	0.557692	52	0.234043		2016-02-18	w1118, TbHnM18	4	0.0769231	47	0.903846	1	0.0192308	52	-0.958333
2016-02-15	w1118	5	0.0925926	0.0925926	9	0.166667	40	0.740741	54	0.632653		2016-02-15	w1118 + epinastine	5	0.0925926	10	0.185185	39	0.722222	54	0.591837		2016-02-18	w1118, TbHnM18	5	0.1	2	0.04	43	0.86	50	0.911111
2016-02-15	w1118	5	0.0892857	0.0892857	1	0.0178571	50	0.892857	56	0.960784		2016-02-15	w1118 + epinastine	4	0.0754717	11	0.207547	38	0.716981	53	0.55102		2016-02-18	w1118, TbHnM18	5	0.0943396	5	0.0943396	43	0.811321	53	0.791667
2016-02-15	w1118	1	0.0185185	0.0185185	18	0.333333	35	0.648148	54	0.320755		2016-02-18	w1118 + epinastine	2	0.0408163	15	0.306122	32	0.653061	49	0.361702		2016-02-29	w1118, TbHnM18	5	0.0909091	49	0.890909	1	0.0181818	55	-0.96
2016-02-15	w1118	3	0.0545455	0.0545455	15	0.272727	37	0.672727	55	0.423077		2016-02-18	w1118 + epinastine	4	0.0784314	34	0.666667	13	0.254902	51	-0.446809		2016-02-29	w1118, TbHnM18	5	0.0925926	14	0.259259	35	0.648148	54	0.428571
2016-02-15	w1118	5	0.0980392	0.0980392	24	0.470588	22	0.431373	51	-0.0434783		2016-02-18	w1118 + epinastine	4	0.0727273	33	0.6	18	0.327273	55	-0.294118		2016-02-29	w1118, TbHnM18	5	0.0943396	31	0.584906	17	0.320755	53	-0.291667
2016-02-15	w1118	2	0.0357143	0.0357143	22	0.392857	32	0.571429	56	0.185185		2016-02-18	w1118 + epinastine	1	0.0175439	8	0.140351	48	0.842105	57	0.714286		2016-02-29	w1118, TbHnM18	5	0.0806452	18	0.290323	39	0.629032	62	0.368421
2016-02-15	w1118	5	0.0980392	0.0980392	3	0.0588235	43	0.843137	51	0.869565		2016-02-18	w1118 + epinastine	2	0.0350877	7	0.122807	48	0.842105	57	0.745455		2016-02-29	w1118, TbHnM18	5	0.0980392	13	0.254902	33	0.647059	51	0.434783
2016-02-18	w1118	4	0.0677966	0.0677966	20	0.338983	35	0.59322	59	0.272727		2016-02-18	w1118 + epinastine	5	0.0961538	20	0.384615	27	0.519231	52	0.148936		2016-02-29	w1118, TbHnM18	2	0.0384615	23	0.442308	27	0.519231	52	0.08
2016-02-18	w1118	2	0.037037	0.037037	10	0.185185	42	0.777778	54	0.615385		2016-02-18	w1118 + epinastine	4	0.0714286	27	0.482143	25	0.446429	56	-0.0384615		2016-02-29	w1118, TbHnM18	5	0.0980392	34	0.666667	12	0.235294	51	-0.478261
2016-02-18	w1118	3	0.0508475	0.0508475	39	0.661017	17	0.288136	59	-0.392857		2016-02-18	w1118 + epinastine	0	0	50	0.909091	5	0.0909091	55	-0.818182		2016-02-29	w1118, TbHnM18	5	0.0961538	31	0.596154	16	0.307692	52	-0.319149
2016-02-18	w1118	2	0.0363636	0.0363636	7	0.127273	46	0.836364	55	0.735849		2016-02-18	w1118 + epinastine	4	0.0784314	6	0.117647	41	0.803922	51	0.744681
2016-02-18	w1118	0	0	0	23	0.396552	35	0.603448	58	0.206897		2016-02-18	w1118 + epinastine	1	0.0185185	33	0.611111	20	0.37037	54	-0.245283
2016-02-18	w1118	1	0.0169492	0.0169492	3	0.0508475	55	0.932203	59	0.896552		2016-02-18	w1118 + epinastine	3	0.05	1	0.0166667	56	0.933333	60	0.964912
2016-02-18	w1118	2	0.0357143	0.0357143	1	0.0178571	53	0.946429	56	0.962963		2016-02-18	w1118 + epinastine	2	0.0357143	26	0.464286	28	0.5	56	0.037037
2016-02-18	w1118	4	1899-12-31 01:36:00	0.0666667	1	0.0166667	55	0.916667	60	0.964286		2016-02-29	w1118 + epinastine	5	0.0980392	31	0.607843	15	0.294118	51	-0.347826
2016-02-29	w1118	5	0.0909091	0.0909091	19	0.345455	31	0.563636	55	0.24		2016-02-29	w1118 + epinastine	5	0.0961538	8	0.153846	39	0.75	52	0.659574
2016-02-29	w1118	5	0.0909091	0.0909091	4	0.0727273	46	0.836364	55	0.84		2016-02-29	w1118 + epinastine	5	0.0943396	31	0.584906	17	0.320755	53	-0.291667
2016-02-29	w1118	5	0.108696	0.108696	8	0.173913	33	0.717391	46	0.609756		2016-02-29	w1118 + epinastine	5	0.1	9	0.18	36	0.72	50	0.6
2016-02-29	w1118	5	0.0980392	0.0980392	2	0.0392157	44	0.862745	51	0.913043		2016-02-29	w1118 + epinastine	5	0.0943396	15	0.283019	33	0.622642	53	0.375
2016-02-29	w1118	5	0.0943396	0.0943396	12	0.226415	36	0.679245	53	0.5
																								w1118 non-fed significantly different from zero
													Genotype	Mittelwert	Stabw	Sterror	n
													w1118	0.453004	0.409291	0.0760035	29
													w1118 + epinastine	0.106983	0.574399	0.108551	28
													w1118, TbHnM18	0.0201988	0.614807	0.141046	19
													ANOVA post hoc Tukey											w1118 fed significantly different from zero
													w1118		0.0415114	0.0191521
													w1118 + epinastine	0.0415114		0.845699
													w1118, TbHnM18	0.0191521	0.845699
																								TbhnM18 non-fed significantly different from zero

## Sheet: Figure 5C
w1118 and Tbh nM18 non-fed and pre-fed with clonidine
Date	Fly line	# out	%out	%out	juice	% juice	EtOH	5% EtOH	total	Index		Date	Fly line	# out	%out	juice	% juice	EtOH	5% EtOH	total	Index		Date	Fly line	# out	%out	juice	% juice	EtOH	5% EtOH	total	Index		Date	Fly line	# out	%out	juice	% juice	EtOH	5% EtOH	total	Index
2017-03-06	w1118	4	0.0784314	0.0784314	23	0.45098	24	0.470588	51	0.0212766		2017-03-03	w1118 + clonidine	5	0.0980392	13	0.254902	33	0.647059	51	0.434783		2017-03-01	w1118, TbhnM18	2	0.0384615	44	0.846154	6	0.115385	52	-0.76		2017-03-01	w1118, TbhnM18 + clonidine	5	0.0943396	24	0.45283	24	0.45283	53	0
2017-03-06	w1118	2	0.04	0.04	19	0.38	29	0.58	50	0.208333		2017-03-06	w1118 + clonidine	5	0.0925926	24	0.444444	25	0.462963	54	0.0204082		2017-03-01	w1118, TbhnM18	3	0.0566038	15	0.283019	35	0.660377	53	0.4		2017-03-01	w1118, TbhnM18 + clonidine	5	0.0943396	14	0.264151	34	0.641509	53	0.416667
2017-03-06	w1118	5	0.0925926	0.0925926	15	0.277778	34	0.62963	54	0.387755		2017-03-07	w1118 + clonidine	5	0.0943396	20	0.377358	28	0.528302	53	0.166667		2017-03-01	w1118, TbhnM18	4	0.0727273	10	0.181818	41	0.745455	55	0.607843		2017-03-03	w1118, TbhnM18 + clonidine	2	0.0384615	11	0.211538	39	0.75	52	0.56
2017-03-06	w1118	0	0	0	12	0.235294	39	0.764706	51	0.529412		2017-04-25	w1118 + clonidine	4	0.0754717	20	0.377358	29	0.54717	53	0.183673		2017-03-03	w1118, TbhnM18	4	0.0784314	39	0.764706	8	0.156863	51	-0.659574		2017-03-03	w1118, TbhnM18 + clonidine	4	0.0754717	5	0.0943396	44	0.830189	53	0.795918
2017-03-07	w1118	5	0.0980392	0.0980392	17	0.333333	29	0.568627	51	0.26087		2017-04-25	w1118 + clonidine	2	0.0357143	21	0.375	33	0.589286	56	0.222222		2017-03-03	w1118, TbhnM18	1	0.0185185	36	0.666667	17	0.314815	54	-0.358491		2017-03-06	w1118, TbhnM18 + clonidine	4	0.0740741	15	0.277778	35	0.648148	54	0.4
2017-03-07	w1118	0	0	0	11	0.22	39	0.78	50	0.56		2017-04-25	w1118 + clonidine	5	0.0943396	16	0.301887	32	0.603774	53	0.333333		2017-03-03	w1118, TbhnM18	5	0.0961538	11	0.211538	36	0.692308	52	0.531915		2017-03-06	w1118, TbhnM18 + clonidine	5	0.0943396	11	0.207547	37	0.698113	53	0.541667
2017-03-09	w1118	3	0.0566038	0.0566038	27	0.509434	23	0.433962	53	-0.08		2017-04-25	w1118 + clonidine	2	0.037037	14	0.259259	38	0.703704	54	0.461538		2017-03-06	w1118, TbhnM18	3	0.0535714	33	0.589286	20	0.357143	56	-0.245283		2017-03-06	w1118, TbhnM18 + clonidine	0	0	5	0.0961538	47	0.903846	52	0.807692
2017-03-09	w1118	5	0.0925926	0.0925926	19	0.351852	30	0.555556	54	0.22449		2017-04-25	w1118 + clonidine	5	0.0909091	10	0.181818	40	0.727273	55	0.6		2017-03-06	w1118, TbhnM18	2	0.0363636	19	0.345455	34	0.618182	55	0.283019		2017-03-07	w1118, TbhnM18 + clonidine	5	0.0961538	20	0.384615	27	0.519231	52	0.148936
2017-03-09	w1118	5	0.0925926	0.0925926	16	0.296296	33	0.611111	54	0.346939		2017-04-28	w1118 + clonidine	3	0.06	15	0.3	32	0.64	50	0.361702		2017-03-06	w1118, TbhnM18	3	0.0566038	7	0.132075	43	0.811321	53	0.72		2017-03-07	w1118, TbhnM18 + clonidine	2	0.037037	22	0.407407	30	0.555556	54	0.153846
2017-04-25	w1118	1	0.0185185	0.0185185	14	0.259259	39	0.722222	54	0.471698		2017-04-28	w1118 + clonidine	0	0	14	0.285714	35	0.714286	49	0.428571		2017-03-07	w1118, TbhnM18	2	0.037037	33	0.611111	19	0.351852	54	-0.269231		2017-03-07	w1118, TbhnM18 + clonidine	5	0.0961538	8	0.153846	39	0.75	52	0.659574
2017-04-25	w1118	4		0.0769231	12	0.230769	36	0.692308	52	0.5		2017-06-07	w1118 + clonidine	2	0.0377358	18	0.339623	33	0.622642	53	0.294118		2017-03-07	w1118, TbhnM18	5	0.0925926	12	0.222222	37	0.685185	54	0.510204		2017-04-25	w1118, TbhnM18 + clonidine	0	0	6	0.109091	49	0.890909	55	0.781818
2017-04-25	w1118	5		0.0925926	11	0.203704	38	0.703704	54	0.55102		2017-06-07	w1118 + clonidine	0	0	15	0.272727	40	0.727273	55	0.454545		2017-03-07	w1118, TbhnM18	5	0.0961538	10	0.192308	37	0.711538	52	0.574468		2017-06-07	w1118, TbhnM18 + clonidine	4	0.0769231	25	0.480769	23	0.442308	52	-0.0416667
2017-04-28	w1118	1	0.0192308	0.0192308	13	0.25	38	0.730769	52	0.490196		2017-06-09	w1118 + clonidine	2	0.0384615	24	0.461538	26	0.5	52	0.04		2017-03-07	w1118, TbhnM18	5	0.0961538	9	0.173077	38	0.730769	52	0.617021		2017-06-07	w1118, TbhnM18 + clonidine	4	0.0769231	22	0.423077	26	0.5	52	0.0833333
2017-06-07	w1118	3	0.0526316	0.0526316	14	0.245614	40	0.701754	57	0.481481		2017-06-13	w1118 + clonidine	5	0.1	12	0.24	33	0.66	50	0.466667		2017-03-09	w1118, TbhnM18	5	0.1	9	0.18	36	0.72	50	0.6		2017-06-07	w1118, TbhnM18 + clonidine	4	0.08	5	0.1	41	0.82	50	0.782609
2017-06-09	w1118	5	0.0943396	0.0943396	9	0.169811	39	0.735849	53	0.625		2017-06-13	w1118 + clonidine	5	0.0943396	12	0.226415	36	0.679245	53	0.5		2017-04-25	w1118, TbhnM18	5	0.0909091	44	0.8	6	0.109091	55	-0.76		2017-06-09	w1118, TbhnM18 + clonidine	1	0.0188679	16	0.301887	36	0.679245	53	0.384615
2017-06-13	w1118	3	0.0566038	0.0566038	22	0.415094	28	0.528302	53	0.12		2017-10-23	w1118 + clonidine	3	0.0566038	25	0.471698	25	0.471698	53	0		2017-04-25	w1118, TbhnM18	4	0.0727273	34	0.618182	17	0.309091	55	-0.333333		2017-06-09	w1118, TbhnM18 + clonidine	1	0.0188679	8	0.150943	44	0.830189	53	0.692308
2017-06-13	w1118	5	0.0943396	0.0943396	17	0.320755	31	0.584906	53	0.291667		2017-10-23	w1118 + clonidine	0	0	22	0.415094	31	0.584906	53	0.169811		2017-04-28	w1118, TbhnM18	4	0.0740741	13	0.240741	37	0.685185	54	0.48		2017-06-13	w1118, TbhnM18 + clonidine	5	0.0961538	24	0.461538	23	0.442308	52	-0.0212766
2017-10-23	w1118	0		0	26	0.490566	27	0.509434	53	0.0188679		2017-10-23	w1118 + clonidine	0	0	17	0.320755	36	0.679245	53	0.358491		2017-06-07	w1118, TbhnM18	5	0.1	18	0.36	27	0.54	50	0.2		2017-06-13	w1118, TbhnM18 + clonidine	5	0.0943396	24	0.45283	24	0.45283	53	0
2017-10-23	w1118	0	0	0	15	0.283019	38	0.716981	53	0.433962		2017-10-24	w1118 + clonidine	2	0.037037	23	0.425926	29	0.537037	54	0.115385		2017-10-23	w1118, TbhnM18	0	0	35	0.660377	18	0.339623	53	-0.320755		2017-06-13	w1118, TbhnM18 + clonidine	4	0.0740741	5	0.0925926	45	0.833333	54	0.8
2017-10-24	w1118	1	0.0192308	0.0192308	28	0.538462	23	0.442308	52	-0.0980392		2017-10-24	w1118 + clonidine	2	0.0384615	22	0.423077	28	0.538462	52	0.12		2017-10-23	w1118, TbhnM18	0	0	23	0.442308	29	0.557692	52	0.115385		2017-10-23	w1118, TbhnM18 + clonidine	2	0.037037	25	0.462963	27	0.5	54	0.0384615
2017-10-24	w1118	1		0.0192308	12	0.230769	39	0.75	52	0.529412		2017-10-24	w1118 + clonidine	0	0	19	0.351852	35	0.648148	54	0.296296		2017-10-23	w1118, TbhnM18	0	0	10	0.196078	41	0.803922	51	0.607843		2017-10-23	w1118, TbhnM18 + clonidine	0	0	8	0.156863	43	0.843137	51	0.686275
2017-10-24	w1118	2	0.0377358	0.0377358	9	0.169811	42	0.792453	53	0.647059		2017-10-26	w1118 + clonidine	2	0.0377358	24	0.45283	27	0.509434	53	0.0588235		2017-10-24	w1118, TbhnM18	3	0.0566038	34	0.641509	16	0.301887	53	-0.36		2017-10-24	w1118, TbhnM18 + clonidine	1	0.0181818	22	0.4	32	0.581818	55	0.185185
2017-10-26	w1118	2	0.0384615	0.0384615	27	0.519231	23	0.442308	52	-0.08		2017-10-26	w1118 + clonidine	0	0	23	0.425926	31	0.574074	54	0.148148		2017-10-24	w1118, TbhnM18	2	0.0377358	29	0.54717	22	0.415094	53	-0.137255		2017-10-24	w1118, TbhnM18 + clonidine	1	0.0204082	7	0.142857	41	0.836735	49	0.708333
2017-10-26	w1118	1	0.0188679	0.0188679	20	0.377358	32	0.603774	53	0.230769		2017-10-26	w1118 + clonidine	0	0	22	0.4	33	0.6	55	0.2		2017-10-24	w1118, TbhnM18	2	0.037037	29	0.537037	23	0.425926	54	-0.115385		2017-10-24	w1118, TbhnM18 + clonidine	3	0.0555556	4	0.0740741	47	0.87037	54	0.843137
2017-10-26	w1118	3	0.0566038	0.0566038	19	0.358491	31	0.584906	53	0.24		2017-10-26	w1118 + clonidine	0	0	17	0.326923	35	0.673077	52	0.346154		2017-10-24	w1118, TbhnM18	2	0.0377358	9	0.169811	42	0.792453	53	0.647059		2017-10-26	w1118, TbhnM18 + clonidine	0	0	20	0.37037	34	0.62963	54	0.259259
2017-10-26	w1118	5	0.0943396	0.0943396	18	0.339623	30	0.566038	53	0.25		2017-10-26	w1118 + clonidine	1	0.0185185	12	0.222222	41	0.759259	54	0.54717		2017-10-26	w1118, TbhnM18	2	0.0357143	27	0.482143	27	0.482143	56	0		2017-10-26	w1118, TbhnM18 + clonidine	1	0.0185185	9	0.166667	44	0.814815	54	0.660377
2017-10-30	w1118	1	0.0181818	0.0181818	18	0.327273	36	0.654545	55	0.333333		2017-10-30	w1118 + clonidine	1	0.0188679	26	0.490566	26	0.490566	53	0		2017-10-26	w1118, TbhnM18	2	0.0384615	18	0.346154	32	0.615385	52	0.28		2017-10-26	w1118, TbhnM18 + clonidine	5	0.0943396	8	0.150943	40	0.754717	53	0.666667
2017-10-30	w1118	0	0	0	17	0.309091	38	0.690909	55	0.381818		2017-10-30	w1118 + clonidine	3	0.0566038	18	0.339623	32	0.603774	53	0.28		2017-10-30	w1118, TbhnM18	1	0.02	41	0.82	8	0.16	50	-0.673469		2017-10-26	w1118, TbhnM18 + clonidine	3	0.0576923	7	0.134615	42	0.807692	52	0.714286
2017-10-30	w1118	0	0	0	15	0.294118	36	0.705882	51	0.411765													2017-10-30	w1118, TbhnM18	0	0	8	0.150943	45	0.849057	53	0.698113		2017-10-30	w1118, TbhnM18 + clonidine	0	0	24	0.45283	29	0.54717	53	0.0943396
2017-10-30	w1118	0	0	0	10	0.181818	45	0.818182	55	0.636364																								2017-10-30	w1118, TbhnM18 + clonidine	1	0.0204082	5	0.102041	43	0.877551	49	0.791667
																																		2017-10-30	w1118, TbhnM18 + clonidine	0	0	5	0.0961538	47	0.903846	52	0.807692
																								w1118 non-fed significantly different from zero
													Genotype	Mittelwert	Stabw	Sterror	n
													w1118	0.330848	0.219422	0.0400607	30
													w1118 + clonidine	0.271732	0.175318	0.0331319	28
													w1118, TbhnM18	0.0993136	0.491872	0.0913383	29
													w1118, TbhnM18 + clonidine	0.464572	0.315284	0.0566267	31
													ANOVA post hoc Tukey											w1118 fed significantly different from zero
													w1118		0.899306	0.0352991	0.376914
													w1118 + clonidine	0.899306		0.19144	0.108523
													w1118, TbhnM18	0.0352991	0.19144		0.000288176
													w1118, TbhnM18 + clonidine	0.376914	0.108523	0.000288176
																								TbhnM18 non-fed significantly different from zero
																								TbhnM18 fed significantly different from zero

## Sheet: Figure 5D
w1118 and Tbh nM18 non-fed and pre-fed with naphazoline
Date	Fly line	# out	%out	%out	juice	% juice	EtOH	5% EtOH	total	Index		Date	Fly line	# out	%out	juice	% juice	EtOH	5% EtOH	total	Index		Date	Fly line	# out	%out	juice	% juice	EtOH	5% EtOH	total	Index		Date	Fly line	# out	%out	juice	% juice	EtOH	5% EtOH	total	Index
2017-07-01	w1118	5	0.1	0.1	3	0.06	42	0.84	50	0.866667		2017-07-01	w1118 + naphazoline	4	0.0754717	34	0.641509	15	0.283019	53	-0.387755		2017-07-01	w1118, TbhnM18	5	0.0980392	43	0.843137	3	0.0588235	51	-0.869565		2017-07-01	w1118, TbhnM18 + naphazoline	5	0.0943396	20	0.377358	28	0.528302	53	0.166667
2017-07-03	w1118	3	0.0555556	0.0555556	12	0.222222	39	0.722222	54	0.529412		2017-07-01	w1118 + naphazoline	5	0.0925926	32	0.592593	17	0.314815	54	-0.306122		2017-07-01	w1118, TbhnM18	5	0.0961538	43	0.826923	4	0.0769231	52	-0.829787		2017-07-01	w1118, TbhnM18 + naphazoline	5	0.0909091	16	0.290909	34	0.618182	55	0.36
2017-07-03	w1118	2	0.0377358	0.0377358	9	0.169811	42	0.792453	53	0.647059		2017-07-01	w1118 + naphazoline	1	0.0181818	20	0.363636	34	0.618182	55	0.259259		2017-07-01	w1118, TbhnM18	0	0	47	0.903846	5	0.0961538	52	-0.807692		2017-07-01	w1118, TbhnM18 + naphazoline	1	0.0188679	5	0.0943396	47	0.886792	53	0.807692
2017-07-03	w1118	3	0.0588235	0.0588235	6	0.117647	42	0.823529	51	0.75		2017-07-01	w1118 + naphazoline	3	0.0566038	7	0.132075	43	0.811321	53	0.72		2017-07-01	w1118, TbhnM18	4	0.0740741	27	0.5	23	0.425926	54	-0.08		2017-07-01	w1118, TbhnM18 + naphazoline	1	0.0208333	3	0.0625	44	0.916667	48	0.87234
2017-07-03	w1118	3	0.0576923	0.0576923	3	0.0576923	46	0.884615	52	0.877551		2017-07-01	w1118 + naphazoline	3	0.0625	5	0.104167	40	0.833333	48	0.777778		2017-07-03	w1118, TbhnM18	5	0.0980392	16	0.313725	30	0.588235	51	0.304348		2017-07-03	w1118, TbhnM18 + naphazoline	5	0.0980392	32	0.627451	14	0.27451	51	-0.391304
2017-07-07	w1118	3	0.0545455	0.0545455	23	0.418182	29	0.527273	55	0.115385		2017-07-03	w1118 + naphazoline	0	0	32	0.603774	21	0.396226	53	-0.207547		2017-07-03	w1118, TbhnM18	5	0.0961538	9	0.173077	38	0.730769	52	0.617021		2017-07-03	w1118, TbhnM18 + naphazoline	1	0.0185185	31	0.574074	22	0.407407	54	-0.169811
2017-07-07	w1118	2	0.0384615	0.0384615	10	0.192308	40	0.769231	52	0.6		2017-07-03	w1118 + naphazoline	3	0.0545455	24	0.436364	28	0.509091	55	0.0769231		2017-07-03	w1118, TbhnM18	4	0.0769231	5	0.0961538	43	0.826923	52	0.791667		2017-07-03	w1118, TbhnM18 + naphazoline	5	0.0909091	26	0.472727	24	0.436364	55	-0.04
2017-07-07	w1118	4	0.0754717	0.0754717	5	0.0943396	44	0.830189	53	0.795918		2017-07-03	w1118 + naphazoline	0	0	13	0.25	39	0.75	52	0.5		2017-07-07	w1118, TbhnM18	5	0.0943396	42	0.792453	6	0.113208	53	-0.75		2017-07-03	w1118, TbhnM18 + naphazoline	5	0.0961538	7	0.134615	40	0.769231	52	0.702128
2017-07-10	w1118	3	0.06	0.06	23	0.46	24	0.48	50	0.0212766		2017-07-03	w1118 + naphazoline	1	0.0188679	10	0.188679	42	0.792453	53	0.615385		2017-07-07	w1118, TbhnM18	5	0.1	24	0.48	21	0.42	50	-0.0666667		2017-07-03	w1118, TbhnM18 + naphazoline	5	0.1	6	0.12	39	0.78	50	0.733333
2017-07-10	w1118	5	0.1	0.1	2	0.04	43	0.86	50	0.911111		2017-07-03	w1118 + naphazoline	0	0	8	0.148148	46	0.851852	54	0.703704		2017-07-07	w1118, TbhnM18	5	0.0925926	22	0.407407	27	0.5	54	0.102041		2017-07-03	w1118, TbhnM18 + naphazoline	5	0.1	3	0.06	42	0.84	50	0.866667
2017-07-24	w1118	0	0	0	16	0.307692	36	0.692308	52	0.384615		2017-07-03	w1118 + naphazoline	3	0.0566038	4	0.0754717	46	0.867925	53	0.84		2017-07-07	w1118, TbhnM18	5	0.1	17	0.34	28	0.56	50	0.244444		2017-07-07	w1118, TbhnM18 + naphazoline	5	0.0909091	36	0.654545	14	0.254545	55	-0.44
2017-07-24	w1118	0	0	0	6	0.109091	49	0.890909	55	0.781818		2017-07-07	w1118 + naphazoline	5	0.0980392	16	0.313725	30	0.588235	51	0.304348		2017-07-07	w1118, TbhnM18	5	0.0909091	6	0.109091	44	0.8	55	0.76		2017-07-07	w1118, TbhnM18 + naphazoline	5	0.0909091	26	0.472727	24	0.436364	55	-0.04
2017-07-24	w1118	0	0	0	4	0.0754717	49	0.924528	53	0.849057		2017-07-07	w1118 + naphazoline	3	0.0566038	10	0.188679	40	0.754717	53	0.6		2017-07-10	w1118, TbhnM18	4	0.0769231	7	0.134615	41	0.788462	52	0.708333		2017-07-07	w1118, TbhnM18 + naphazoline	5	0.0980392	22	0.431373	24	0.470588	51	0.0434783
2017-07-26	w1118	0	0	0	13	0.25	39	0.75	52	0.5		2017-07-07	w1118 + naphazoline	5	0.1	9	0.18	36	0.72	50	0.6		2017-07-26	w1118, TbhnM18	4	0.0754717	34	0.641509	15	0.283019	53	-0.387755		2017-07-07	w1118, TbhnM18 + naphazoline	5	0.0909091	7	0.127273	43	0.781818	55	0.72
2017-07-26	w1118	2	0.0392157	0.0392157	9	0.176471	40	0.784314	51	0.632653		2017-07-10	w1118 + naphazoline	3	0.0576923	31	0.596154	18	0.346154	52	-0.265306		2017-07-28	w1118, TbhnM18	2	0.0377358	43	0.811321	8	0.150943	53	-0.686275		2017-07-07	w1118, TbhnM18 + naphazoline	4	0.0754717	3	0.0566038	46	0.867925	53	0.877551
2017-07-26	w1118	4	0.0727273	0.0727273	9	0.163636	42	0.763636	55	0.647059		2017-07-10	w1118 + naphazoline	5	0.0980392	3	0.0588235	43	0.843137	51	0.869565		2017-07-28	w1118, TbhnM18	4	0.0714286	22	0.392857	30	0.535714	56	0.153846		2017-07-10	w1118, TbhnM18 + naphazoline	5	0.1	6	0.12	39	0.78	50	0.733333
2017-07-26	w1118	0	0	0	5	0.0909091	50	0.909091	55	0.818182		2017-07-24	w1118 + naphazoline	1	0.0192308	13	0.25	38	0.730769	52	0.490196		2017-07-28	w1118, TbhnM18	4	0.0714286	20	0.357143	32	0.571429	56	0.230769		2017-07-24	w1118, TbhnM18 + naphazoline	1	0.0192308	16	0.307692	35	0.673077	52	0.372549
2017-07-28	w1118	3	0.0545455	0.0545455	15	0.272727	37	0.672727	55	0.423077		2017-07-24	w1118 + naphazoline	1	0.0192308	9	0.173077	42	0.807692	52	0.647059		2017-07-28	w1118, TbhnM18	0	0	7	0.134615	45	0.865385	52	0.730769		2017-07-24	w1118, TbhnM18 + naphazoline	0	0	4	0.0740741	50	0.925926	54	0.851852
2017-07-28	w1118	2	0.0392157	0.0392157	9	0.176471	40	0.784314	51	0.632653		2017-07-28	w1118 + naphazoline	2	0.0377358	35	0.660377	16	0.301887	53	-0.372549		2017-07-28	w1118, TbhnM18	2	0.037037	4	0.0740741	48	0.888889	54	0.846154		2017-07-28	w1118, TbhnM18 + naphazoline	3	0.0555556	30	0.555556	21	0.388889	54	-0.176471
2017-07-28	w1118	5	0.0980392	0.0980392	7	0.137255	39	0.764706	51	0.695652		2017-07-28	w1118 + naphazoline	1	0.0181818	37	0.672727	17	0.309091	55	-0.37037		2017-07-31	w1118, TbhnM18	1	0.0188679	35	0.660377	17	0.320755	53	-0.346154		2017-07-28	w1118, TbhnM18 + naphazoline	1	0.0181818	18	0.327273	36	0.654545	55	0.333333
2017-07-28	w1118	0	0	0	6	0.117647	45	0.882353	51	0.764706		2017-07-28	w1118 + naphazoline	1	0.0188679	27	0.509434	25	0.471698	53	-0.0384615		2017-07-31	w1118, TbhnM18	4	0.0769231	13	0.25	35	0.673077	52	0.458333		2017-07-28	w1118, TbhnM18 + naphazoline	4	0.0754717	6	0.113208	43	0.811321	53	0.755102
2017-07-31	w1118	3	0.0588235	0.0588235	19	0.372549	29	0.568627	51	0.208333		2017-07-28	w1118 + naphazoline	2	0.0377358	14	0.264151	37	0.698113	53	0.45098		2017-07-31	w1118, TbhnM18	0	0	7	0.132075	46	0.867925	53	0.735849		2017-07-28	w1118, TbhnM18 + naphazoline	1	0.0178571	6	0.107143	49	0.875	56	0.781818
2017-07-31	w1118	1	0.0188679	0.0188679	16	0.301887	36	0.679245	53	0.384615		2017-07-31	w1118 + naphazoline	0	0	33	0.622642	20	0.377358	53	-0.245283		2017-08-29	w1118, TbhnM18	0	0	35	0.686275	16	0.313725	51	-0.372549		2017-07-28	w1118, TbhnM18 + naphazoline	0	0	4	0.0740741	50	0.925926	54	0.851852
2017-07-31	w1118	0	0	0	14	0.269231	38	0.730769	52	0.461538		2017-07-31	w1118 + naphazoline	1	0.02	8	0.16	41	0.82	50	0.673469		2017-08-29	w1118, TbhnM18	5	0.0961538	20	0.384615	27	0.519231	52	0.148936		2017-07-31	w1118, TbhnM18 + naphazoline	3	0.0566038	23	0.433962	27	0.509434	53	0.08
2017-07-31	w1118	3	0.0588235	0.0588235	11	0.215686	37	0.72549	51	0.541667		2017-07-31	w1118 + naphazoline	0	0	5	0.0943396	48	0.90566	53	0.811321		2017-08-31	w1118, TbhnM18	5	0.0925926	33	0.611111	16	0.296296	54	-0.346939		2017-08-29	w1118, TbhnM18 + naphazoline	2	0.0384615	13	0.25	37	0.711538	52	0.48
2017-07-31	w1118	2	0.0408163	0.0408163	4	0.0816327	43	0.877551	49	0.829787		2017-08-29	w1118 + naphazoline	0	0	25	0.471698	28	0.528302	53	0.0566038		2017-08-31	w1118, TbhnM18	5	0.0980392	24	0.470588	22	0.431373	51	-0.0434783		2017-08-29	w1118, TbhnM18 + naphazoline	5	0.1	9	0.18	36	0.72	50	0.6
2017-08-29	w1118	1	0.0196078	0.0196078	5	0.0980392	45	0.882353	51	0.8		2017-08-29	w1118 + naphazoline	1	0.0188679	13	0.245283	39	0.735849	53	0.5		2017-08-31	w1118, TbhnM18	5	0.0943396	18	0.339623	30	0.566038	53	0.25		2017-08-29	w1118, TbhnM18 + naphazoline	0	0	5	0.0909091	50	0.909091	55	0.818182
2017-08-31	w1118	0	0	0	21	0.388889	33	0.611111	54	0.222222		2017-08-31	w1118 + naphazoline	0	0	25	0.5	25	0.5	50	0		2017-08-31	w1118, TbhnM18	5	0.0925926	5	0.0925926	44	0.814815	54	0.795918		2017-08-29	w1118, TbhnM18 + naphazoline	2	0.0384615	4	0.0769231	46	0.884615	52	0.84
2017-08-31	w1118	0	0	0	15	0.288462	37	0.711538	52	0.423077		2017-08-31	w1118 + naphazoline	1	0.0204082	7	0.142857	41	0.836735	49	0.708333		2017-09-05	w1118, TbhnM18	5	0.1	4	0.08	41	0.82	50	0.822222		2017-08-31	w1118, TbhnM18 + naphazoline	3	0.0545455	28	0.509091	24	0.436364	55	-0.0769231
2017-08-31	w1118	0	0	0	6	0.113208	47	0.886792	53	0.773585		2017-09-05	w1118 + naphazoline	0	0	35	0.729167	13	0.270833	48	-0.458333													2017-08-31	w1118, TbhnM18 + naphazoline	5	0.0943396	3	0.0566038	45	0.849057	53	0.875
2017-09-05	w1118	1	0.0212766	0.0212766	16	0.340426	30	0.638298	47	0.304348		2017-09-05	w1118 + naphazoline	4	0.0816327	12	0.244898	33	0.673469	49	0.466667													2017-09-05	w1118, TbhnM18 + naphazoline	5	0.1	17	0.34	28	0.56	50	0.244444
2017-09-05	w1118	0	0	0	10	0.2	40	0.8	50	0.6		2017-09-05	w1118 + naphazoline	1	0.02	12	0.24	37	0.74	50	0.510204													2017-09-05	w1118, TbhnM18 + naphazoline	5	0.1	8	0.16	37	0.74	50	0.644444
												2017-09-05	w1118 + naphazoline	3	0.0625	10	0.208333	35	0.729167	48	0.555556													2017-09-05	w1118, TbhnM18 + naphazoline	5	0.1	6	0.12	39	0.78	50	0.733333
																								w1118 non-fed significantly different from zero
													Genotype	Mittelwert	Stabw	Sterror	n
													w1118	0.587282	0.237958	0.0420655	32
													w1118 + naphazoline	0.305625	0.430601	0.0749581	33
													w1118, TbhnM18	0.107372	0.56885	0.105633	29
													w1118, TbhnM18 + naphazoline	0.448806	0.417672	0.0727074	33
													ANOVA post hoc Tukey											w1118 fed significantly different from zero
													w1118		0.0386327	7.1973e-05	0.556559
													w1118 + naphazoline	0.0386327		0.260079	0.521454
													w1118, TbhnM18	7.1973e-05	0.260079		0.00892414
													w1118, TbhnM18 + naphazoline	0.556559	0.521454	0.00892414
																								TbhnM18 non-fed significantly different from zero
																								TbhnM18 fed significantly different from zero

## Sheet: Figure 5E
w1118 and Tbh nM18 non-fed and pre-fed with yohimbine
Date	Fly line	# out	%out	%out	juice	% juice	EtOH	5% EtOH	total	Index		Date	Fly line	# out	%out	juice	% juice	EtOH	5% EtOH	total	Index		Date	Fly line	# out	%out	juice	% juice	EtOH	5% EtOH	total	Index		Date	Fly line	# out	%out	juice	% juice	EtOH	5% EtOH	total	Index
2015-09-03	w1118	2	0.0384615	0.0384615	4	0.0769231	46	0.884615	52	0.84		2015-09-03	w1118 + yohimbine	0	0	9	0.176471	42	0.823529	51	0.647059		2015-09-03	w1118, TbHnM18	5	0.0961538	15	0.288462	32	0.615385	52	0.361702		2015-09-03	w1118, TbHnM18 + yohimbine	5	0.0980392	20	0.392157	26	0.509804	51	0.130435
2015-09-03	w1118	1	0.0188679	0.0188679	10	0.188679	42	0.792453	53	0.615385		2015-09-03	w1118 + yohimbine	0	0	35	0.686275	16	0.313725	51	-0.372549		2015-09-03	w1118, TbHnM18	5	0.1	5	0.1	40	0.8	50	0.777778		2015-09-03	w1118, TbHnM18 + yohimbine	3	0.0588235	11	0.215686	37	0.72549	51	0.541667
2015-09-03	w1118	1	0.0196078	0.0196078	15	0.294118	35	0.686275	51	0.4		2015-09-03	w1118 + yohimbine	1	0.0196078	2	0.0392157	48	0.941176	51	0.92		2015-09-03	w1118, TbHnM18	5	0.1	43	0.86	2	0.04	50	-0.911111		2015-09-03	w1118, TbHnM18 + yohimbine	5	0.1	36	0.72	9	0.18	50	-0.6
2015-09-03	w1118	2		0.0392157	35	0.686275	14	0.27451	51	-0.428571		2015-09-03	w1118 + yohimbine	0	0	20	0.4	30	0.6	50	0.2		2015-09-07	w1118, TbHnM18	5	0.102041	34	0.693878	10	0.204082	49	-0.545455		2015-09-07	w1118, TbHnM18 + yohimbine	5	0.0980392	42	0.823529	4	0.0784314	51	-0.826087
2015-09-03	w1118	2	0.0392157	0.0392157	13	0.254902	36	0.705882	51	0.469388		2015-09-03	w1118 + yohimbine	0	0	12	0.230769	40	0.769231	52	0.538462		2015-09-08	w1118, TbHnM18	5	0.0980392	35	0.686275	11	0.215686	51	-0.521739		2015-09-08	w1118, TbHnM18 + yohimbine	5	0.0943396	20	0.377358	28	0.528302	53	0.166667
2015-09-07	w1118	2	0.037037	0.037037	7	0.12963	45	0.833333	54	0.730769		2015-09-07	w1118 + yohimbine	1	0.0204082	24	0.489796	24	0.489796	49	0		2015-10-15	w1118, TbHnM18	3	0.0588235	24	0.470588	24	0.470588	51	0		2015-10-15	w1118, TbHnM18 + yohimbine	5	0.106383	40	0.851064	2	0.0425532	47	-0.904762
2015-09-07	w1118	1	0.0188679	0.0188679	37	0.698113	15	0.283019	53	-0.423077		2015-09-07	w1118 + yohimbine	1	0.0196078	25	0.490196	25	0.490196	51	0		2015-10-15	w1118, TbHnM18	2	0.0384615	47	0.903846	3	0.0576923	52	-0.88		2015-10-15	w1118, TbHnM18 + yohimbine	5	0.0980392	33	0.647059	13	0.254902	51	-0.434783
2015-09-07	w1118	4	0.0754717	0.0754717	22	0.415094	27	0.509434	53	0.102041		2015-09-07	w1118 + yohimbine	0	0	2	0.0384615	50	0.961538	52	0.923077		2015-10-21	w1118, TbHnM18	2	0.0384615	32	0.615385	18	0.346154	52	-0.28		2015-10-21	w1118, TbHnM18 + yohimbine	5	0.0961538	23	0.442308	24	0.461538	52	0.0212766
2015-09-07	w1118	3	0.0555556	0.0555556	3	0.0555556	48	0.888889	54	0.882353		2015-09-07	w1118 + yohimbine	0	0	9	0.18	41	0.82	50	0.64		2015-10-26	w1118, TbHnM18	5	0.1	30	0.6	15	0.3	50	-0.333333		2015-10-26	w1118, TbHnM18 + yohimbine	3	0.0588235	28	0.54902	20	0.392157	51	-0.166667
2015-09-08	w1118	4	0.08	0.08	1	0.02	45	0.9	50	0.956522		2015-09-07	w1118 + yohimbine	2	0.037037	21	0.388889	31	0.574074	54	0.192308		2015-10-26	w1118, TbHnM18	5	0.1	18	0.36	27	0.54	50	0.2		2015-10-26	w1118, TbHnM18 + yohimbine	5	0.0980392	31	0.607843	15	0.294118	51	-0.347826
2015-09-08	w1118	1	0.02	0.02	20	0.4	29	0.58	50	0.183673		2015-09-08	w1118 + yohimbine	4	0.0754717	5	0.0943396	44	0.830189	53	0.795918		2015-10-28	w1118, TbHnM18	5	0.1	3	0.06	42	0.84	50	0.866667		2015-10-26	w1118, TbHnM18 + yohimbine	5	0.104167	15	0.3125	28	0.583333	48	0.302326
2015-09-08	w1118	3	0.0576923	0.0576923	41	0.788462	8	0.153846	52	-0.673469		2015-09-08	w1118 + yohimbine	2	0.0408163	8	0.163265	39	0.795918	49	0.659574		2015-10-28	w1118, TbHnM18	5	0.104167	1	0.0208333	42	0.875	48	0.953488		2015-10-26	w1118, TbHnM18 + yohimbine	5	0.1	4	0.08	41	0.82	50	0.822222
2015-09-08	w1118	3	0.0566038	0.0566038	20	0.377358	30	0.566038	53	0.2		2015-09-08	w1118 + yohimbine	2	0.0416667	10	0.208333	36	0.75	48	0.565217		2015-11-10	w1118, TbHnM18	5	0.0943396	23	0.433962	25	0.471698	53	0.0416667		2015-10-28	w1118, TbHnM18 + yohimbine	5	0.1	13	0.26	32	0.64	50	0.422222
2015-09-08	w1118	2	0.0384615	0.0384615	25	0.480769	25	0.480769	52	0		2015-09-08	w1118 + yohimbine	0	0	2	0.04	48	0.96	50	0.92		2015-11-10	w1118, TbHnM18	5	0.0980392	4	0.0784314	42	0.823529	51	0.826087		2015-10-28	w1118, TbHnM18 + yohimbine	4	0.0784314	44	0.862745	3	0.0588235	51	-0.87234
2015-09-08	w1118	4	0.0784314	0.0784314	11	0.215686	36	0.705882	51	0.531915		2015-09-08	w1118 + yohimbine	1	0.0196078	31	0.607843	19	0.372549	51	-0.24		2015-11-10	w1118, TbHnM18	5	0.0980392	44	0.862745	2	0.0392157	51	-0.913043		2015-11-10	w1118, TbHnM18 + yohimbine	5	0.0961538	8	0.153846	39	0.75	52	0.659574
2015-10-15	w1118	2	0.0377358	0.0377358	3	0.0566038	48	0.90566	53	0.882353		2015-09-08	w1118 + yohimbine	5	0.1	12	0.24	33	0.66	50	0.466667		2015-11-12	w1118, TbHnM18	5	0.1	20	0.4	25	0.5	50	0.111111		2015-11-10	w1118, TbHnM18 + yohimbine	5	0.0943396	46	0.867925	2	0.0377358	53	-0.916667
2015-10-15	w1118	5	0.0909091	0.0909091	17	0.309091	33	0.6	55	0.32		2015-09-08	w1118 + yohimbine	2	0.0392157	18	0.352941	31	0.607843	51	0.265306		2015-11-12	w1118, TbHnM18	5	0.0980392	45	0.882353	1	0.0196078	51	-0.956522		2015-11-10	w1118, TbHnM18 + yohimbine	5	0.1	28	0.56	17	0.34	50	-0.244444
2015-10-15	w1118	2	0.0384615	0.0384615	5	0.0961538	45	0.865385	52	0.8		2015-09-08	w1118 + yohimbine	0	0	39	0.764706	12	0.235294	51	-0.529412		2015-11-12	w1118, TbHnM18	5	0.0943396	18	0.339623	30	0.566038	53	0.25		2015-11-12	w1118, TbHnM18 + yohimbine	5	0.1	35	0.7	10	0.2	50	-0.555556
2015-10-15	w1118	4	1899-12-31 01:50:46	0.0769231	25	0.480769	23	0.442308	52	-0.0416667		2015-10-15	w1118 + yohimbine	3	0.0576923	10	0.192308	39	0.75	52	0.591837		2015-11-16	w1118, TbHnM18	5	0.0925926	8	0.148148	41	0.759259	54	0.673469		2015-11-12	w1118, TbHnM18 + yohimbine	5	0.1	21	0.42	24	0.48	50	0.0666667
2015-10-21	w1118	5	0.0980392	0.0980392	15	0.294118	31	0.607843	51	0.347826		2015-10-15	w1118 + yohimbine	3	0.0612245	2	0.0408163	44	0.897959	49	0.913043		2015-11-16	w1118, TbHnM18	5	0.0961538	7	0.134615	40	0.769231	52	0.702128		2015-11-16	w1118, TbHnM18 + yohimbine	3	0.0625	7	0.145833	38	0.791667	48	0.688889
2015-10-21	w1118	2	0.0392157	0.0392157	18	0.352941	31	0.607843	51	0.265306		2015-10-21	w1118 + yohimbine	4	0.0784314	34	0.666667	13	0.254902	51	-0.446809		2015-11-16	w1118, TbHnM18	5	0.0943396	31	0.584906	17	0.320755	53	-0.291667		2015-11-16	w1118, TbHnM18 + yohimbine	3	0.0555556	11	0.203704	40	0.740741	54	0.568627
2015-10-21	w1118	5	0.0980392	0.0980392	19	0.372549	27	0.529412	51	0.173913		2015-10-21	w1118 + yohimbine	5	0.0980392	19	0.372549	27	0.529412	51	0.173913													2015-11-16	w1118, TbHnM18 + yohimbine	5	0.0961538	4	0.0769231	43	0.826923	52	0.829787
2015-10-21	w1118	2	0.0363636	0.0363636	42	0.763636	11	0.2	55	-0.584906		2015-10-21	w1118 + yohimbine	1	0.0192308	26	0.5	25	0.480769	52	-0.0196078													2015-11-16	w1118, TbHnM18 + yohimbine	5	0.0980392	37	0.72549	9	0.176471	51	-0.608696
2015-10-21	w1118	2	0.0377358	0.0377358	9	0.169811	42	0.792453	53	0.647059		2015-10-21	w1118 + yohimbine	3	0.0576923	3	0.0576923	46	0.884615	52	0.877551													2015-11-16	w1118, TbHnM18 + yohimbine	2	0.0363636	53	0.963636	0	0	55	-1
2015-10-21	w1118	4	0.08	0.08	35	0.7	11	0.22	50	-0.521739		2015-10-21	w1118 + yohimbine	3	0.0576923	18	0.346154	31	0.596154	52	0.265306
2015-10-21	w1118	2	0.0392157	0.0392157	9	0.176471	40	0.784314	51	0.632653		2015-10-21	w1118 + yohimbine	0	0	23	0.442308	29	0.557692	52	0.115385
2015-10-21	w1118	5	0.0961538	0.0961538	8	0.153846	39	0.75	52	0.659574		2015-10-26	w1118 + yohimbine	5	0.1	10	0.2	35	0.7	50	0.555556
2015-10-26	w1118	5	0.0943396	0.0943396	12	0.226415	36	0.679245	53	0.5		2015-10-26	w1118 + yohimbine	5	0.0943396	1	0.0188679	47	0.886792	53	0.958333
2015-10-26	w1118	5	0.0961538	0.0961538	1	0.0192308	46	0.884615	52	0.957447		2015-10-26	w1118 + yohimbine	5	0.111111	13	0.288889	27	0.6	45	0.35
2015-10-26	w1118	3	0.0576923	0.0576923	24	0.461538	25	0.480769	52	0.0204082		2015-10-28	w1118 + yohimbine	5	0.104167	14	0.291667	29	0.604167	48	0.348837
2015-10-28	w1118	5	0.102041	0.102041	14	0.285714	30	0.612245	49	0.363636		2015-10-28	w1118 + yohimbine	5	0.108696	16	0.347826	25	0.543478	46	0.219512
2015-10-28	w1118	5	0.1	0.1	4	0.08	41	0.82	50	0.822222		2015-10-28	w1118 + yohimbine	5	0.0980392	2	0.0392157	44	0.862745	51	0.913043
2015-11-10	w1118	5	0.0877193	0.0877193	13	0.22807	39	0.684211	57	0.5		2015-11-10	w1118 + yohimbine	5	0.0961538	5	0.0961538	42	0.807692	52	0.787234
2015-11-12	w1118	2	0.0377358	0.0377358	43	0.811321	8	0.150943	53	-0.686275		2015-11-10	w1118 + yohimbine	5	0.0961538	14	0.269231	33	0.634615	52	0.404255
2015-11-12	w1118	3	0.0576923	0.0576923	3	0.0576923	46	0.884615	52	0.877551		2015-11-12	w1118 + yohimbine	5	0.0961538	8	0.153846	39	0.75	52	0.659574
2015-11-12	w1118	5	0.0980392	0.0980392	8	0.156863	38	0.745098	51	0.652174		2015-11-12	w1118 + yohimbine	5	0.0980392	4	0.0784314	42	0.823529	51	0.826087
2015-11-12	w1118	5	0.0943396	0.0943396	1	0.0188679	47	0.886792	53	0.958333		2015-11-12	w1118 + yohimbine	1	0.0188679	32	0.603774	20	0.377358	53	-0.230769
2015-11-16	w1118	5	0.0909091	0.0909091	8	0.145455	42	0.763636	55	0.68		2015-11-16	w1118 + yohimbine	4	0.0740741	18	0.333333	32	0.592593	54	0.28
2015-11-16	w1118	5	0.0943396	0.0943396	7	0.132075	41	0.773585	53	0.708333		2015-11-16	w1118 + yohimbine	3	0.0555556	12	0.222222	39	0.722222	54	0.529412
2015-11-16	w1118	5	0.0961538	0.0961538	4	0.0769231	43	0.826923	52	0.829787		2015-11-16	w1118 + yohimbine	3	0.0555556	3	0.0555556	48	0.888889	54	0.882353
																								w1118 non-fed significantly different from zero
													Genotype	Mittelwert	Stabw	Sterror	n
													w1118	0.378773	0.486014	0.0768455	40
													w1118 + yohimbine	0.413642	0.416366	0.0658333	40
													w1118, TbHnM18	0.00624889	0.645684	0.1409	21
													w1118, TbHnM18 + yohimbine	-0.0940611	0.609238	0.12436	24
													ANOVA post hoc Tukey											w1118 fed significantly different from zero
													w1118		0.990691	0.0398388	0.00249568
													w1118 + yohimbine	0.990691		0.0194458	0.000942205
													w1118, TbHnM18	0.0398388	0.0194458		0.917577
													w1118, TbHnM18 + yohimbine	0.00249568	0.000942205	0.917577
																								TbhnM18 non-fed significantly different from zero
																								TbhnM18 fed significantly different from zero

## Sheet: Figure 5F
w1118 and Tbh nM18 non-fed and pre-fed with tyramine
Date	Fly line	# out	%out	%out	juice	% juice	EtOH	5% EtOH	total	Index		Date	Fly line	# out	%out	juice	% juice	EtOH	5% EtOH	total	Index		Date	Fly line	# out	%out	juice	% juice	EtOH	5% EtOH	total	Index		Date	Fly line	# out	%out	juice	% juice	EtOH	5% EtOH	total	Index
2018-03-26	w1118	3	0.0545455	0.0545455	27	0.490909	25	0.454545	55	-0.0384615		2018-03-26	w1118 + tyramine	3	0.0576923	36	0.692308	13	0.25	52	-0.469388		2018-03-26	w1118, TbhnM18	1	0.0181818	22	0.4	32	0.581818	55	0.185185		2018-03-26	w1118, TbhnM18 + tyramine	1	0.0192308	8	0.153846	43	0.826923	52	0.686275
2018-03-26	w1118	5	0.0909091	0.0909091	25	0.454545	25	0.454545	55	0		2018-03-26	w1118 + tyramine	3	0.0555556	33	0.611111	18	0.333333	54	-0.294118		2018-03-28	w1118, TbhnM18	5	0.0943396	38	0.716981	10	0.188679	53	-0.583333		2018-03-26	w1118, TbhnM18 + tyramine	5	0.0961538	1	0.0192308	46	0.884615	52	0.957447
2018-03-26	w1118	3	0.0545455	0.0545455	22	0.4	30	0.545455	55	0.153846		2018-03-26	w1118 + tyramine	2	0.0377358	21	0.396226	30	0.566038	53	0.176471		2018-03-28	w1118, TbhnM18	5	0.1	34	0.68	11	0.22	50	-0.511111		2018-03-28	w1118, TbhnM18 + tyramine	5	0.0961538	30	0.576923	17	0.326923	52	-0.276596
2018-03-26	w1118	2	0.037037	0.037037	16	0.296296	36	0.666667	54	0.384615		2018-03-26	w1118 + tyramine	2	0.037037	5	0.0925926	47	0.87037	54	0.807692		2018-03-28	w1118, TbhnM18	5	0.0961538	29	0.557692	18	0.346154	52	-0.234043		2018-03-28	w1118, TbhnM18 + tyramine	5	0.0961538	15	0.288462	32	0.615385	52	0.361702
2018-03-26	w1118	1	0.0185185	0.0185185	2	0.037037	51	0.944444	54	0.924528		2018-03-26	w1118 + tyramine	5	0.1	3	0.06	42	0.84	50	0.866667		2018-03-28	w1118, TbhnM18	4	0.0754717	23	0.433962	26	0.490566	53	0.0612245		2018-03-28	w1118, TbhnM18 + tyramine	3	0.0612245	6	0.122449	40	0.816327	49	0.73913
2018-03-28	w1118	5	0.0961538	0.0961538	17	0.326923	30	0.576923	52	0.276596		2018-03-28	w1118 + tyramine	4	0.0740741	42	0.777778	8	0.148148	54	-0.68		2018-03-28	w1118, TbhnM18	2	0.0416667	14	0.291667	32	0.666667	48	0.391304		2018-03-28	w1118, TbhnM18 + tyramine	0	0	2	0.0384615	50	0.961538	52	0.923077
2018-03-28	w1118	2	0.0384615	0.0384615	18	0.346154	32	0.615385	52	0.28		2018-03-28	w1118 + tyramine	5	0.0909091	30	0.545455	20	0.363636	55	-0.2		2018-03-30	w1118, TbhnM18	5	0.0961538	18	0.346154	29	0.557692	52	0.234043		2018-03-28	w1118, TbhnM18 + tyramine	3	0.0612245	1	0.0204082	45	0.918367	49	0.956522
2018-03-28	w1118	2	0.0384615	0.0384615	17	0.326923	33	0.634615	52	0.32		2018-03-28	w1118 + tyramine	1	0.0188679	27	0.509434	25	0.471698	53	-0.0384615		2018-03-30	w1118, TbhnM18	5	0.0877193	13	0.22807	39	0.684211	57	0.5		2018-03-30	w1118, TbhnM18 + tyramine	5	0.0909091	13	0.236364	37	0.672727	55	0.48
2018-03-30	w1118	5	0.0862069	0.0862069	30	0.517241	23	0.396552	58	-0.132075		2018-03-28	w1118 + tyramine	5	0.0943396	16	0.301887	32	0.603774	53	0.333333		2018-03-30	w1118, TbhnM18	5	0.0943396	9	0.169811	39	0.735849	53	0.625		2018-03-30	w1118, TbhnM18 + tyramine	5	0.0943396	1	0.0188679	47	0.886792	53	0.958333
2018-03-30	w1118	3	0.0566038	0.0566038	13	0.245283	37	0.698113	53	0.48		2018-03-28	w1118 + tyramine	5	0.0925926	3	0.0555556	46	0.851852	54	0.877551		2018-03-30	w1118, TbhnM18	4	0.0727273	6	0.109091	45	0.818182	55	0.764706		2018-04-02	w1118, TbhnM18 + tyramine	3	0.0576923	33	0.634615	16	0.307692	52	-0.346939
2018-03-30	w1118	0	0	0	4	0.0769231	48	0.923077	52	0.846154		2018-03-30	w1118 + tyramine	5	0.0588235	30	0.352941	50	0.588235	85	0.25		2018-04-02	w1118, TbhnM18	5	0.0925926	40	0.740741	9	0.166667	54	-0.632653		2018-04-02	w1118, TbhnM18 + tyramine	3	0.0566038	22	0.415094	28	0.528302	53	0.12
2018-03-30	w1118	4	0.0769231	0.0769231	2	0.0384615	46	0.884615	52	0.916667		2018-03-30	w1118 + tyramine	2	0.0363636	12	0.218182	41	0.745455	55	0.54717		2018-04-02	w1118, TbhnM18	0	0	29	0.54717	24	0.45283	53	-0.0943396		2018-04-02	w1118, TbhnM18 + tyramine	3	0.0566038	15	0.283019	35	0.660377	53	0.4
2018-04-02	w1118	1	0.0181818	0.0181818	21	0.381818	33	0.6	55	0.222222		2018-03-30	w1118 + tyramine	4	0.0701754	5	0.0877193	48	0.842105	57	0.811321		2018-04-06	w1118, TbhnM18	4	0.0754717	44	0.830189	5	0.0943396	53	-0.795918		2018-04-06	w1118, TbhnM18 + tyramine	3	0.0555556	37	0.685185	14	0.259259	54	-0.45098
2018-04-02	w1118	4	0.0677966	0.0677966	18	0.305085	37	0.627119	59	0.345455		2018-03-30	w1118 + tyramine	3	0.0535714	5	0.0892857	48	0.857143	56	0.811321		2018-04-06	w1118, TbhnM18	4	0.0754717	41	0.773585	8	0.150943	53	-0.673469		2018-04-06	w1118, TbhnM18 + tyramine	3	0.0555556	35	0.648148	16	0.296296	54	-0.372549
2018-04-02	w1118	1	0.0181818	0.0181818	3	0.0545455	51	0.927273	55	0.888889		2018-04-02	w1118 + tyramine	2	0.0357143	22	0.392857	32	0.571429	56	0.185185		2018-04-06	w1118, TbhnM18	5	0.1	30	0.6	15	0.3	50	-0.333333		2018-04-06	w1118, TbhnM18 + tyramine	5	0.0961538	19	0.365385	28	0.538462	52	0.191489
2018-04-06	w1118	0	0	0	18	0.346154	34	0.653846	52	0.307692		2018-04-02	w1118 + tyramine	0	0	16	0.307692	36	0.692308	52	0.384615		2018-04-06	w1118, TbhnM18	5	0.0961538	18	0.346154	29	0.557692	52	0.234043		2018-04-06	w1118, TbhnM18 + tyramine	3	0.0566038	1	0.0188679	49	0.924528	53	0.96
2018-04-06	w1118	5	0.0961538	0.0961538	14	0.269231	33	0.634615	52	0.404255		2018-04-02	w1118 + tyramine	1	0.0192308	12	0.230769	39	0.75	52	0.529412		2018-04-09	w1118, TbhnM18	4	0.0740741	42	0.777778	8	0.148148	54	-0.68		2018-04-09	w1118, TbhnM18 + tyramine	2	0.0357143	33	0.589286	21	0.375	56	-0.222222
2018-04-06	w1118	1	0.0181818	0.0181818	14	0.254545	40	0.727273	55	0.481481		2018-04-02	w1118 + tyramine	1	0.0185185	11	0.203704	42	0.777778	54	0.584906		2018-04-09	w1118, TbhnM18	1	0.0188679	31	0.584906	21	0.396226	53	-0.192308		2018-04-09	w1118, TbhnM18 + tyramine	5	0.0925926	22	0.407407	27	0.5	54	0.102041
2018-04-06	w1118	2	0.0377358	0.0377358	13	0.245283	38	0.716981	53	0.490196		2018-04-06	w1118 + tyramine	2	0.037037	30	0.555556	22	0.407407	54	-0.153846		2018-04-09	w1118, TbhnM18	2	0.037037	5	0.0925926	47	0.87037	54	0.807692		2018-04-09	w1118, TbhnM18 + tyramine	5	0.0925926	10	0.185185	39	0.722222	54	0.591837
2018-04-06	w1118	3	1899-12-31 01:20:00	0.0555556	10	0.185185	41	0.759259	54	0.607843		2018-04-06	w1118 + tyramine	2	0.0377358	28	0.528302	23	0.433962	53	-0.0980392		2018-04-09	w1118, TbhnM18	3	0.0625	4	0.0833333	41	0.854167	48	0.822222		2018-04-09	w1118, TbhnM18 + tyramine	5	0.0980392	5	0.0980392	41	0.803922	51	0.782609
2018-04-09	w1118	5	0.1	0.1	28	0.56	17	0.34	50	-0.244444		2018-04-06	w1118 + tyramine	4	0.08	13	0.26	33	0.66	50	0.434783
2018-04-09	w1118	4	0.0754717	0.0754717	10	0.188679	39	0.735849	53	0.591837		2018-04-06	w1118 + tyramine	3	0.06	10	0.2	37	0.74	50	0.574468
2018-04-09	w1118	5	0.0980392	0.0980392	6	0.117647	40	0.784314	51	0.73913		2018-04-09	w1118 + tyramine	1	0.0181818	25	0.454545	29	0.527273	55	0.0740741
2018-04-09	w1118	4	0.0784314	0.0784314	6	0.117647	41	0.803922	51	0.744681		2018-04-09	w1118 + tyramine	3	0.0566038	23	0.433962	27	0.509434	53	0.08
												2018-04-09	w1118 + tyramine	5	0.1	11	0.22	34	0.68	50	0.511111
												2018-04-09	w1118 + tyramine	5	0.1	4	0.08	41	0.82	50	0.822222
												2018-04-09	w1118 + tyramine	5	0.1	4	0.08	41	0.82	50	0.822222
																								w1118 non-fed significantly different from zero
													Genotype	Mittelwert	Stabw	Sterror	n
													w1118	0.416296	0.32965	0.0672896	24
													w1118 + tyramine	0.316692	0.441986	0.0850603	27
													w1118, TbhnM18	-0.00525445	0.543718	0.121579	20
													w1118, TbhnM18 + tyramine	0.377059	0.504267	0.112758	20
													ANOVA post hoc Tukey											w1118 fed significantly different from zero
													w1118		0.8634	0.0154661	0.991975
													w1118 + tyramine	0.8634		0.0852033	0.969617
													w1118, TbhnM18	0.0154661	0.0852033		0.0457042
													w1118, TbhnM18 + tyramine	0.991975	0.969617	0.0457042
																								TbhnM18 non-fed significantly different from zero
																								TbhnM18 fed significantly different from zero
