# Supplementary material for: Octopamine Shifts the Behavioral Response From Indecision to Approach or Aversion in Drosophila melanogaster
Source: Front Behav Neurosci. 2018 Jul 3;12:131. doi: 10.3389/fnbeh.2018.00131 (PMC6037846; doi:10.3389/fnbeh.2018.00131)
Supplement: TABLE S6 — Data for Supplementary Figure S1. [file Table_6.XLSX]

## Sheet: Figure S1A 1
dTdc2-GAL4/UAS-ChR2 1700 lux 2s 40Hz 16s 8Hz 2s 0Hz
genotype 1	date	# out	%out	Yellow light	% yellow	Blue light	% blue	total	Index	total - #out	genotype 2	date	# out	%out	Yellow light	% yellow	Blue light	% blue	total	Index	total - #out
Control	2011-03-14	0	0	36	0.433735	47	0.566265	83	0.13253	83	Retinal	2011-03-14	1	0.0133333	22	0.293333	52	0.693333	75	0.405405	74
Control	2011-03-15	1	0.0138889	32	0.444444	39	0.541667	72	0.0985915	71	Retinal	2011-03-15	2	0.027027	41	0.554054	31	0.418919	74	-0.138889	72
Control	2011-03-15	0	0	48	0.571429	36	0.428571	84	-0.142857	84	Retinal	2011-03-15	2	0.0217391	10	0.108696	80	0.869565	92	0.777778	90
Control	2011-03-22	2	0.0215054	36	0.387097	55	0.591398	93	0.208791	91	Retinal	2011-03-18	0	0	31	0.369048	53	0.630952	84	0.261905	84
Control	2011-03-22	1	0.012987	18	0.233766	58	0.753247	77	0.526316	76	Retinal	2011-03-22	1	0.0126582	11	0.139241	67	0.848101	79	0.717949	78
Control	2011-03-31	1	0.0138889	52	0.722222	19	0.263889	72	-0.464789	71	Retinal	2011-03-22	5	0.0666667	23	0.306667	47	0.626667	75	0.342857	70
Control	2011-04-01	1	0.0117647	69	0.811765	15	0.176471	85	-0.642857	84	Retinal	2011-03-31	1	0.0111111	11	0.122222	78	0.866667	90	0.752809	89
Control	2011-04-04	2	0.025641	49	0.628205	27	0.346154	78	-0.289474	76	Retinal	2011-04-01	3	0.0375	22	0.275	55	0.6875	80	0.428571	77
Control	2011-04-05	1	0.0108696	25	0.271739	66	0.717391	92	0.450549	91	Retinal	2011-04-05	2	0.0277778	19	0.263889	51	0.708333	72	0.457143	70
Control	2011-04-05	5	0.0595238	31	0.369048	48	0.571429	84	0.21519	79	Retinal	2011-04-05	1	0.0135135	30	0.405405	43	0.581081	74	0.178082	73
Control	2011-04-07	0	0	57	0.780822	16	0.219178	73	-0.561644	73	Retinal	2015-03-02	0	0	10	0.204082	39	0.795918	49	0.591837	49
Control	2015-03-02	0	0	45	0.882353	6	0.117647	51	-0.764706	51	Retinal	2015-03-02	0	0	35	0.686275	16	0.313725	51	-0.372549	51
Control	2015-03-02	0	0	41	0.788462	11	0.211538	52	-0.576923	52	Retinal	2015-03-02	0	0	16	0.301887	37	0.698113	53	0.396226	53
Control	2015-03-02	0	0	28	0.528302	25	0.471698	53	-0.0566038	53	Retinal	2015-03-02	0	0	0	0	52	1	52	1	52
Control	2015-03-02	0	0	45	0.9375	3	0.0625	48	-0.875	48	Retinal	2015-03-02	0	0	20	0.392157	31	0.607843	51	0.215686	51
Control	2015-03-03	0	0	13	0.270833	35	0.729167	48	0.458333	48	Retinal	2015-03-03	3	0.06	31	0.62	16	0.32	50	-0.319149	47
Control	2015-03-03	0	0	45	0.882353	6	0.117647	51	-0.764706	51	Retinal	2015-03-03	2	0.0392157	38	0.745098	11	0.215686	51	-0.55102	49
Control	2015-03-03	0	0	15	0.288462	37	0.711538	52	0.423077	52	Retinal	2015-03-03	2	0.04	15	0.3	33	0.66	50	0.375	48
Control	2015-03-03	0	0	18	0.346154	34	0.653846	52	0.307692	52	Retinal	2015-03-03	0	0	0	0	51	1	51	1	51
Control	2015-03-03	0	0	3	0.06	47	0.94	50	0.88	50	Retinal	2015-03-03	0	0	28	0.538462	24	0.461538	52	-0.0769231	52
Mean									-0.0719244											0.322136
Stde									0.516671											0.438324
s.e.m.									0.115531											0.0980123
n									20											20
	Genotype	Mean	Stde	s.e.m.	n
	Control	-0.0719244	0.516671	0.115531	20
	Retinal	0.322136	0.438324	0.0980123	20
		T-test
		0.0131731
	Control group significantly different from zero
	Experimental group significantly different from zero

## Sheet: Figure S1A 2
dTdc2-GAL4/UAS-ChR2 1000 lux 2s 40Hz 16s 8Hz 2s 0Hz
genotype 1	date	# out	%out	Yellow light	% yellow	Blue light	% blue	total	Index	total - #out	genotype 2	date	# out	%out	Yellow light	% yellow	Blue light	% blue	total	Index	total - #out
Control	2015-08-27	1	0.0208333	20	0.416667	27	0.5625	48	0.148936	47	Retinal	2015-08-27	0	0	1	0.0196078	50	0.980392	51	0.960784	51
Control	2015-08-27	0	0	52	1	0	0	52	-1	52	Retinal	2015-08-27	0	0	46	1	0	0	46	-1	46
Control	2015-08-27	1	0.0196078	0	0	50	0.980392	51	1	50	Retinal	2015-08-27	0	0	0	0	48	1	48	1	48
Control	2015-09-02	0	0	20	0.408163	29	0.591837	49	0.183673	49	Retinal	2015-08-27	0	0	0	0	50	1	50	1	50
Control	2015-09-02	0	0	0	0	49	1	49	1	49	Retinal	2015-08-27	0	0	0	0	50	1	50	1	50
Control	2015-09-02	0	0	48	1	0	0	48	-1	48	Retinal	2015-09-02	1	0.02	0	0	49	0.98	50	1	49
Control	2015-09-02	0	0	0	0	50	1	50	1	50	Retinal	2015-09-02	1	0	0	0	46	1	46	1	46
Control	2015-09-03	0	0	0	0	50	1	50	1	50	Retinal	2015-09-02	0	0.0196078	49	0.960784	1	0.0196078	51	-0.96	50
Control	2015-09-03	2	0.0408163	2	0.0408163	45	0.918367	49	0.914894	47	Retinal	2015-09-02	1	0	1	0.0204082	48	0.979592	49	0.959184	49
Control	2015-09-03	0	0	2	0.04	48	0.96	50	0.92	50	Retinal	2015-09-02	0	0.0392157	0	0	49	0.960784	51	1	49
Control	2015-09-03	1	0.0204082	22	0.44898	26	0.530612	49	0.0833333	48	Retinal	2015-09-03	2	0.0384615	1	0.0192308	49	0.942308	52	0.96	50
Control	2015-09-03	0	0	40	0.833333	8	0.166667	48	-0.666667	48	Retinal	2015-09-03	2	0.0392157	25	0.490196	24	0.470588	51	-0.0204082	49
Control	2015-09-03	0	0	22	0.44	28	0.56	50	0.12	50	Retinal	2015-09-07	0	0	0	0	51	1	51	1	51
Control	2015-09-07	0	0	46	0.884615	6	0.115385	52	-0.769231	52	Retinal	2015-09-07	0	0	0	0	48	1	48	1	48
Control	2015-09-07	1	0.0196078	0	0	50	0.980392	51	1	50	Retinal	2015-09-07	0	0	4	0.0816327	45	0.918367	49	0.836735	49
Control	2015-09-07	1	0.0196078	4	0.0784314	46	0.901961	51	0.84	50	Retinal	2015-09-08	3	0.0576923	1	0.0192308	48	0.923077	52	0.959184	49
Control	2015-09-08	1	0.02	1	0.02	48	0.96	50	0.959184	49	Retinal	2015-09-08	0	0	25	0.510204	24	0.489796	49	-0.0204082	49
Control	2015-09-08	0	0	1	0.0208333	47	0.979167	48	0.958333	48	Retinal	2015-10-15	0	0	0	0	49	1	49	1	49
Control	2015-09-08	1	0.0196078	49	0.960784	1	0.0196078	51	-0.96	50	Retinal	2015-10-15	0	0	43	0.895833	5	0.104167	48	-0.791667	48
Control	2015-10-15	0	0	0	0	48	1	48	1	48	Retinal	2015-10-15	0	0	7	0.134615	45	0.865385	52	0.730769	52
Control	2015-10-15	1	0.0204082	13	0.265306	35	0.714286	49	0.458333	48	Retinal	2015-10-15	0	0	0	0	50	1	50	1	50
Control	2015-10-15	0	0	50	1	0	0	50	-1	50	Retinal	2015-10-15	1	0.0196078	31	0.607843	19	0.372549	51	-0.24	50
Control	2015-10-15	0	0	62	1	0	0	62	-1	62	Retinal	2015-10-22	0	0	0	0	52	1	52	1	52
Control	2015-10-15	1	0.0208333	0	0	47	0.979167	48	1	47	Retinal	2015-10-22	0	0	0	0	51	1	51	1	51
Control	2015-10-22	0	0	48	0.923077	4	0.0769231	52	-0.846154	52	Retinal	2015-10-22	4	0.08	3	0.06	43	0.86	50	0.869565	46
Control	2015-10-22	0	0	25	0.490196	26	0.509804	51	0.0196078	51	Retinal	2015-10-22	4	0.0769231	25	0.480769	23	0.442308	52	-0.0416667	48
Control	2015-10-22	0	0	0	0	49	1	49	1	49	Retinal	2015-10-26	0	0	10	0.212766	37	0.787234	47	0.574468	47
Control	2015-10-22	0	0	0	0	50	1	50	1	50	Retinal	2015-10-26	1	0.0192308	0	0	51	0.980769	52	1	51
Control	2015-10-22	0	0	50	1	0	0	50	-1	50	Retinal	2015-10-26	0	0	0	0	52	1	52	1	52
Control	2015-10-26	0	0	0	0	49	1	49	1	49	Retinal	2015-10-26	0	0	33	0.66	17	0.34	50	-0.32	50
Control	2015-10-26	0	0	4	0.0769231	48	0.923077	52	0.846154	52	Retinal	2015-10-26	0	0	0	0	48	1	48	1	48
Control	2015-10-26	0	0	50	0.980392	1	0.0196078	51	-0.960784	51	Retinal
Control	2015-10-26	0	0	28	0.571429	21	0.428571	49	-0.142857	49	Retinal
Control	2015-10-26	0	0	22	0.44898	27	0.55102	49	0.102041	49	Retinal
Mean									0.212023											0.595372
Stde									0.822605											0.651344
s.e.m.									0.141076											0.116985
n									34											31
	Genotype	Mean	Stde	s.e.m.	n
	Control	0.212023	0.822605	0.141076	34
	Retinal	0.595372	0.651344	0.116985	31
		T-test
		0.0426201
	Control group significantly different from zero
	Experimental group significantly different from zero

## Sheet: Figure S1A 3
dTdc2-GAL4/UAS-ChR2 800 lux 2s 40Hz 16s 8Hz 2s 0Hz
genotype 1	date	# out	%out	Yellow light	% yellow	Blue light	% blue	total	Index	total - #out	genotype 2	date	# out	%out	Yellow light	% yellow	Blue light	% blue	total	Index	total - #out
Control	2016-06-16	0	0	11	0.22	39	0.78	50	0.56	50	Retinal	2016-06-16	0	0	21	0.4375	27	0.5625	48	0.125	48
Control	2016-06-16	0	0	25	0.5	25	0.5	50	0	50	Retinal	2016-06-16	1	0.0192308	0	0	51	0.980769	52	1	51
Control	2016-06-16	0	0	18	0.36	32	0.64	50	0.28	50	Retinal	2016-06-16	0	0	0	0	51	1	51	1	51
Control	2016-06-16	0	0	19	0.404255	28	0.595745	47	0.191489	47	Retinal	2016-06-21	0	0	9	0.18	41	0.82	50	0.64	50
Control	2016-06-21	0	0	41	0.82	9	0.18	50	-0.64	50	Retinal	2016-06-21	1	0.0196078	0	0	50	0.980392	51	1	50
Control	2016-06-21	0	0	17	0.314815	37	0.685185	54	0.37037	54	Retinal	2016-06-21	1	0.0188679	17	0.320755	35	0.660377	53	0.346154	52
Control	2016-06-21	0	0	28	0.54902	23	0.45098	51	-0.0980392	51	Retinal	2016-06-21	0	0	39	0.764706	12	0.235294	51	-0.529412	51
Control	2016-06-21	0	0	1	0.0192308	51	0.980769	52	0.961538	52	Retinal	2016-06-21	0	0	24	0.510638	23	0.489362	47	-0.0212766	47
Control	2016-06-21	0	0	42	0.792453	11	0.207547	53	-0.584906	53	Retinal	2016-06-21	1	0.0188679	20	0.377358	32	0.603774	53	0.230769	52
Control	2016-06-21	0	0	22	0.431373	29	0.568627	51	0.137255	51	Retinal	2016-06-21	1	0.0208333	12	0.25	35	0.729167	48	0.489362	47
Control	2016-06-21	1	0.0212766	8	0.170213	38	0.808511	47	0.652174	46	Retinal	2016-06-21	0	0	51	1	0	0	51	-1	51
Control	2016-06-21	0	0	50	1	0	0	50	-1	50	Retinal	2016-06-23	0	0	15	0.294118	36	0.705882	51	0.411765	51
Control	2016-06-23	0	0	37	0.72549	14	0.27451	51	-0.45098	51	Retinal	2016-06-23	0	0	16	0.313725	35	0.686275	51	0.372549	51
Control	2016-06-23	0	0	13	0.276596	34	0.723404	47	0.446809	47	Retinal	2016-06-23	0	0	0	0	50	1	50	1	50
Control	2016-06-23	0	0	23	0.442308	29	0.557692	52	0.115385	52	Retinal	2016-06-23	0	0	1	0.0196078	50	0.980392	51	0.960784	51
Control	2016-06-23	0	0	15	0.3	35	0.7	50	0.4	50	Retinal	2016-06-28	1	0.0196078	4	0.0784314	46	0.901961	51	0.84	50
Control	2016-06-23	0	0	43	0.826923	9	0.173077	52	-0.653846	52	Retinal	2016-06-28	0	0	1	0.02	49	0.98	50	0.96	50
Control	2016-06-28	0	0	16	0.301887	37	0.698113	53	0.396226	53	Retinal	2016-06-28	0	0	0	0	52	1	52	1	52
Control	2016-06-28	0	0	38	0.730769	14	0.269231	52	-0.461538	52	Retinal	2016-06-30	1	0.0192308	0	0	51	0.980769	52	1	51
Control	2016-06-28	0	0	23	0.442308	29	0.557692	52	0.115385	52	Retinal	2016-06-30	0	0	52	1	0	0	52	-1	52
Control	2016-06-28	1	0.0192308	4	0.0769231	47	0.903846	52	0.843137	51	Retinal	2016-06-30	0	0	4	0.0754717	49	0.924528	53	0.849057	53
Control	2016-06-28	1	0.0185185	47	0.87037	6	0.111111	54	-0.773585	53	Retinal
Control	2016-06-30	2	0.0408163	30	0.612245	17	0.346939	49	-0.276596	47	Retinal
Control	2016-06-30	0	0	0	0	51	1	51	1	51	Retinal
Control	2016-06-30	0	0	43	0.86	7	0.14	50	-0.72	50	Retinal
Control	2016-06-30	0	0	7	0.132075	46	0.867925	53	0.735849	53	Retinal
Control	2016-06-30	0	0	40	0.769231	12	0.230769	52	-0.538462	52	Retinal
Mean									0.0373209											0.460702
Stde									0.581149											0.641906
s.e.m.									0.111842											0.140075
n									27											21
	Genotype	Mean	Stde	s.e.m.	n
	Control	0.0373209	0.581149	0.111842	27
	Retinal	0.460702	0.641906	0.140075	21
		T-test
		0.0208958
	Control group significantly different from zero
	Experimental group significantly different from zero

## Sheet: Figure S1B 1
6.2-Tbh-GAL4/UAS-ChR2 1700 lux 2s 40Hz 16s 8Hz 2s 0Hz
genotype 1	date	# out	%out	Yellow light	% yellow	Blue light	% blue	total	Index	total - #out	genotype 2	date	# out	%out	Yellow light	% yellow	Blue light	% blue	total	Index	total - #out
Control	2014-04-15	0	0	69	0.907895	7	0.0921053	76	-0.815789	76	Retinal	2014-04-15	1	0.0125	76	0.95	3	0.0375	80	-0.924051	79
Control	2014-04-15	1	0.012987	10	0.12987	66	0.857143	77	0.736842	76	Retinal	2014-04-15	0	0	70	0.921053	6	0.0789474	76	-0.842105	76
Control	2014-04-15	0	0	1	0.0128205	77	0.987179	78	0.974359	78	Retinal	2014-04-15	5	0.0649351	57	0.74026	15	0.194805	77	-0.583333	72
Control	2014-04-15	0	0	67	0.858974	11	0.141026	78	-0.717949	78	Retinal	2014-04-15	1	0.0135135	16	0.216216	57	0.77027	74	0.561644	73
Control	2014-04-17	1	0.0125	78	0.975	1	0.0125	80	-0.974684	79	Retinal	2014-04-15	1	0.0126582	62	0.78481	16	0.202532	79	-0.589744	78
Control	2014-04-17	0	0	52	0.684211	24	0.315789	76	-0.368421	76	Retinal	2014-04-17	1	0.0136986	52	0.712329	20	0.273973	73	-0.444444	72
Control	2014-04-17	1	0.0126582	42	0.531646	36	0.455696	79	-0.0769231	78	Retinal	2014-04-17	0	0	78	0.987342	1	0.0126582	79	-0.974684	79
Control	2014-04-22	0	0	77	0.974684	2	0.0253165	79	-0.949367	79	Retinal	2014-04-17	1	0.0125	76	0.95	3	0.0375	80	-0.924051	79
Control	2014-04-22	0	0	26	0.325	54	0.675	80	0.35	80	Retinal	2014-04-17	2	0.0253165	74	0.936709	3	0.0379747	79	-0.922078	77
Control	2014-04-22	0	0	53	0.670886	26	0.329114	79	-0.341772	79	Retinal	2014-04-22	0	0	79	0.9875	1	0.0125	80	-0.975	80
Control	2014-04-22	1	0.0121951	38	0.463415	43	0.52439	82	0.0617284	81	Retinal	2014-04-25	2	0.0246914	74	0.91358	5	0.0617284	81	-0.873418	79
Control	2014-04-22	1	0.0125	48	0.6	31	0.3875	80	-0.21519	79	Retinal	2014-04-25	1	0.0126582	69	0.873418	9	0.113924	79	-0.769231	78
Control	2014-04-25	0	0	46	0.597403	31	0.402597	77	-0.194805	77	Retinal	2014-04-25	1	0.0125	69	0.8625	10	0.125	80	-0.746835	79
Control	2014-04-25	0	0	49	0.636364	28	0.363636	77	-0.272727	77	Retinal	2014-05-04	0	0	40	0.506329	39	0.493671	79	-0.0126582	79
Control	2014-05-04	0	0	80	1	0	0	80	-1	80	Retinal	2014-05-04	3	0.0379747	72	0.911392	4	0.0506329	79	-0.894737	76
Control	2014-05-04	1	0.0126582	70	0.886076	8	0.101266	79	-0.794872	78	Retinal	2014-05-04	0	0	36	0.486486	38	0.513514	74	0.027027	74
Control	2014-05-04	1	0.0125	10	0.125	69	0.8625	80	0.746835	79	Retinal
Control	2014-05-04	0	0	77	0.9625	3	0.0375	80	-0.925	80	Retinal
Control	2014-05-04	0	0	63	0.807692	15	0.192308	78	-0.615385	78	Retinal
Control	2014-05-04	1	0.0125	71	0.8875	8	0.1	80	-0.797468	79	Retinal
Mean									-0.309529											-0.617981
Stde									0.616086											0.445134
s.e.m.									0.137761											0.111283
n									20											16
	Genotype	Mean	Stde	s.e.m.	n
	Control	-0.309529	0.616086	0.137761	20
	Retinal	-0.617981	0.445134	0.111283	16
		T-test
		0.10206
	Control group significantly different from zero
	Experimental group significantly different from zero

## Sheet: Figure S1B 2
6.2-Tbh-GAL4/UAS-ChR2 1200 lux 2s 40Hz 16s 8Hz 2s 0Hz
genotype 1	date	# out	%out	Yellow light	% yellow	Blue light	% blue	total	Index	total - #out	genotype 2	date	# out	%out	Yellow light	% yellow	Blue light	% blue	total	Index	total - #out
Control	2014-09-19	2	0.025974	10	0.12987	65	0.844156	77	0.733333	75	Retinal	2014-09-19	1	0.0126582	8	0.101266	70	0.886076	79	0.794872	78
Control	2014-09-19	0	0	20	0.25641	58	0.74359	78	0.487179	78	Retinal	2014-09-19	0	0	77	0.974684	2	0.0253165	79	-0.949367	79
Control	2014-09-19	0	0	44	0.556962	35	0.443038	79	-0.113924	79	Retinal	2014-09-19	0	0	14	0.175	66	0.825	80	0.65	80
Control	2014-09-19	0	0	71	0.910256	7	0.0897436	78	-0.820513	78	Retinal	2014-09-19	0	0	79	0.9875	1	0.0125	80	-0.975	80
Control	2014-09-22	1	0.0128205	3	0.0384615	74	0.948718	78	0.922078	77	Retinal	2014-09-22	0	0	64	0.820513	14	0.179487	78	-0.641026	78
Control	2014-09-22	0	0	44	0.556962	35	0.443038	79	-0.113924	79	Retinal	2014-09-22	0	0	78	0.975	2	0.025	80	-0.95	80
Control	2014-09-22	0	0	78	0.962963	3	0.037037	81	-0.925926	81	Retinal	2014-09-29	1	0.0136986	65	0.890411	7	0.0958904	73	-0.805556	72
Control	2014-09-29	1	0.012987	36	0.467532	40	0.519481	77	0.0526316	76	Retinal	2014-10-02	1	0.0128205	47	0.602564	30	0.384615	78	-0.220779	77
Control	2014-09-29	3	0.0379747	63	0.797468	13	0.164557	79	-0.657895	76	Retinal	2014-10-02	0	0	47	0.580247	34	0.419753	81	-0.160494	81
Control	2014-09-29	0	0	52	0.693333	23	0.306667	75	-0.386667	75	Retinal	2014-10-02	2	0.0246914	68	0.839506	11	0.135802	81	-0.721519	79
Control	2014-09-29	1	0.0133333	24	0.32	50	0.666667	75	0.351351	74	Retinal	2014-10-02	0	0	70	0.921053	6	0.0789474	76	-0.842105	76
Control	2014-10-02	0	0	64	0.853333	11	0.146667	75	-0.706667	75	Retinal	2014-10-06	0	0	73	0.924051	6	0.0759494	79	-0.848101	79
Control	2014-10-02	0	0	13	0.1625	67	0.8375	80	0.675	80	Retinal	2014-10-06	0	0	60	0.769231	18	0.230769	78	-0.538462	78
Control	2014-10-02	1	0.0131579	63	0.828947	12	0.157895	76	-0.68	75	Retinal	2014-10-06	0	0	67	0.8375	13	0.1625	80	-0.675	80
Control	2014-10-02	4	0.0526316	10	0.131579	62	0.815789	76	0.722222	72	Retinal	2014-10-06	2	0.025641	35	0.448718	41	0.525641	78	0.0789474	76
Control	2014-10-02	1	0.0131579	57	0.75	18	0.236842	76	-0.52	75	Retinal	2014-10-09	3	0.04	31	0.413333	41	0.546667	75	0.138889	72
Control	2014-10-06	0	0	4	0.0512821	74	0.948718	78	0.897436	78	Retinal	2014-10-09	0	0	40	0.526316	36	0.473684	76	-0.0526316	76
Control	2014-10-06	2	0.025	64	0.8	14	0.175	80	-0.641026	78	Retinal	2014-10-09	0	0	77	0.9625	3	0.0375	80	-0.925	80
Control	2014-10-06	0	0	27	0.355263	49	0.644737	76	0.289474	76	Retinal	2014-10-09	1	0.0125	45	0.5625	34	0.425	80	-0.139241	79
Control	2014-10-09	0	0	24	0.296296	57	0.703704	81	0.407407	81	Retinal
Control	2014-10-09	0	0	64	0.831169	13	0.168831	77	-0.662338	77	Retinal
Control	2014-10-09	0	0	33	0.402439	49	0.597561	82	0.195122	82	Retinal
Mean									-0.0225292											-0.409556
Stde									0.618428											0.545383
s.e.m.									0.131849											0.125119
n									22											19
	Genotype	Mean	Stde	s.e.m.	n
	Control	-0.0225292	0.618428	0.131849	22
	Retinal	-0.409556	0.545383	0.125119	19
		T-test
		0.0413836
	Control group significantly different from zero
	Experimental group significantly different from zero

## Sheet: Figure S1B 3
6.2-Tbh-GAL4/UAS-ChR2 1000 lux 2s 40Hz 16s 8Hz 2s 0Hz
genotype 1	date	# out	%out	Yellow light	% yellow	Blue light	% blue	total	Index	total - #out	genotype 2	date	# out	%out	Yellow light	% yellow	Blue light	% blue	total	Index	total - #out
Control	2015-03-12	0	0	1	0.0204082	48	0.979592	49	0.959184	49	Retinal	2015-03-12	0	0	9	0.18	41	0.82	50	0.64	50
Control	2015-03-12	0	0	51	0.980769	1	0.0192308	52	-0.961538	52	Retinal	2015-03-12	1	0.02	44	0.88	5	0.1	50	-0.795918	49
Control	2015-03-12	0	0	27	0.5	27	0.5	54	0	54	Retinal	2015-03-12	3	0.0612245	21	0.428571	25	0.510204	49	0.0869565	46
Control	2015-03-12	0	0	37	0.711538	15	0.288462	52	-0.423077	52	Retinal	2015-03-12	1	0.0196078	32	0.627451	18	0.352941	51	-0.28	50
Control	2015-03-12	0	0	53	1	0	0	53	-1	53	Retinal	2015-03-13	0	0	21	0.403846	31	0.596154	52	0.192308	52
Control	2015-03-13	0	0	27	0.509434	26	0.490566	53	-0.0188679	53	Retinal	2015-03-13	0	0	15	0.283019	38	0.716981	53	0.433962	53
Control	2015-03-13	1	0.0192308	20	0.384615	31	0.596154	52	0.215686	51	Retinal	2015-03-13	1	0.0208333	27	0.5625	20	0.416667	48	-0.148936	47
Control	2015-03-13	0	0	44	0.862745	7	0.137255	51	-0.72549	51	Retinal	2015-03-16	0	0	17	0.314815	37	0.685185	54	0.37037	54
Control	2015-03-13	0	0	14	0.264151	39	0.735849	53	0.471698	53	Retinal	2015-03-16	0	0	41	0.788462	11	0.211538	52	-0.576923	52
Control	2015-03-16	0	0	39	0.764706	12	0.235294	51	-0.529412	51	Retinal	2015-03-16	0	0	10	0.185185	44	0.814815	54	0.62963	54
Control	2015-03-16	0	0	5	0.1	45	0.9	50	0.8	50	Retinal	2015-03-16	0	0	27	0.55102	22	0.44898	49	-0.102041	49
Control	2015-03-16	0	0	39	0.75	13	0.25	52	-0.5	52	Retinal	2015-03-17	1	0.0192308	41	0.788462	10	0.192308	52	-0.607843	51
Control	2015-03-17	0	0	29	0.568627	22	0.431373	51	-0.137255	51	Retinal	2015-03-17	0	0	12	0.230769	40	0.769231	52	0.538462	52
Control	2015-03-17	0	0	37	0.711538	15	0.288462	52	-0.423077	52	Retinal	2015-03-17	0	0	1	0.0192308	51	0.980769	52	0.961538	52
Control	2015-03-17	0	0	22	0.431373	29	0.568627	51	0.137255	51	Retinal	2015-03-19	0	0	21	0.42	29	0.58	50	0.16	50
Control	2015-03-17	0	0	41	0.82	9	0.18	50	-0.64	50	Retinal	2015-03-19	0	0	39	0.764706	12	0.235294	51	-0.529412	51
Control	2015-03-19	2	0.0363636	48	0.872727	5	0.0909091	55	-0.811321	53	Retinal	2015-03-19	1	0.0204082	26	0.530612	22	0.44898	49	-0.0833333	48
Control	2015-03-19	1	0.0188679	9	0.169811	43	0.811321	53	0.653846	52	Retinal	2015-03-19	0	0	39	0.75	13	0.25	52	-0.5	52
Control	2015-03-19	0	0	2	0.0377358	51	0.962264	53	0.924528	53	Retinal	2015-03-19	1	0.02	43	0.86	6	0.12	50	-0.755102	49
Control	2015-03-19	2	0.0392157	38	0.745098	11	0.215686	51	-0.55102	49	Retinal
Control	2015-03-19	0	0	25	0.480769	27	0.519231	52	0.0384615	52	Retinal
Mean									-0.120019											-0.019278
Stde									0.614775											0.525109
s.e.m.									0.134155											0.120468
n									21											19
	Genotype	Mean	Stde	s.e.m.	n
	Control	-0.120019	0.614775	0.134155	21
	Retinal	-0.019278	0.525109	0.120468	19
		T-test
		0.582649
	Control group significantly different from zero
	Experimental group significantly different from zero

## Sheet: Figure S1C 1
dTdc2-GAL4/UAS-ReaChR 1200 lux 2s 40Hz 16s 8Hz 2s 0Hz
genotype 1	date	# out	%out	Yellow light	% yellow	Blue light	% blue	total	Index	total - #out	genotype 2	date	# out	%out	Yellow light	% yellow	Blue light	% blue	total	Index	total - #out
Control	2017-08-29	0	0	9	0.176471	42	0.823529	51	0.647059	51	Retinal	2017-08-29	0	0	1	0.02	49	0.98	50	0.96	50
Control	2017-08-29	0	0	29	0.58	21	0.42	50	-0.16	50	Retinal	2017-08-29	2	0.04	10	0.2	38	0.76	50	0.583333	48
Control	2017-10-16	0	0	27	0.519231	25	0.480769	52	-0.0384615	52	Retinal	2017-10-16	1	0.0217391	3	0.0652174	42	0.913043	46	0.866667	45
Control	2017-10-16	0	0	44	0.977778	1	0.0222222	45	-0.955556	45	Retinal	2017-10-16	0	0	9	0.195652	37	0.804348	46	0.608696	46
Control	2017-10-17	0	0	35	0.673077	17	0.326923	52	-0.346154	52	Retinal	2017-10-17	1	0.0204082	11	0.22449	37	0.755102	49	0.541667	48
Control	2017-10-17	0	0	29	0.557692	23	0.442308	52	-0.115385	52	Retinal	2017-10-17	0	0	20	0.416667	28	0.583333	48	0.166667	48
Control	2017-10-19	0	0	4	0.0816327	45	0.918367	49	0.836735	49	Retinal	2017-10-19	0	0	9	0.1875	39	0.8125	48	0.625	48
Control	2017-10-19	1	0.0212766	9	0.191489	37	0.787234	47	0.608696	46	Retinal	2017-10-19	0	0	6	0.12	44	0.88	50	0.76	50
Control	2017-10-20	2	0.04	17	0.34	31	0.62	50	0.291667	48	Retinal	2017-10-20	1	0.0188679	18	0.339623	34	0.641509	53	0.307692	52
Control	2017-10-20	2	0.0408163	4	0.0816327	43	0.877551	49	0.829787	47	Retinal	2017-10-20	0	0	10	0.196078	41	0.803922	51	0.607843	51
Control	2017-10-23	0	0	52	1	0	0	52	-1	52	Retinal	2017-10-23	1	0.0192308	27	0.519231	24	0.461538	52	-0.0588235	51
Control	2017-10-23	1	0.0188679	51	0.962264	1	0.0188679	53	-0.961538	52	Retinal	2017-10-24	0	0	0	0	47	1	47	1	47
Control	2017-10-23	2	0.0384615	49	0.942308	1	0.0192308	52	-0.96	50	Retinal	2017-10-24	0	0	2	0.0416667	46	0.958333	48	0.916667	48
Control	2017-10-24	1	0.02	36	0.72	13	0.26	50	-0.469388	49	Retinal	2017-11-03	0	0	3	0.0666667	42	0.933333	45	0.866667	45
Control	2017-10-24	0	0	18	0.352941	33	0.647059	51	0.294118	51	Retinal	2017-11-03	0	0	6	0.12	44	0.88	50	0.76	50
Control	2017-11-03	0	0	19	0.387755	30	0.612245	49	0.22449	49	Retinal	2017-11-07	0	0	29	0.54717	24	0.45283	53	-0.0943396	53
Control	2017-11-03	0	0	14	0.28	36	0.72	50	0.44	50	Retinal	2017-11-07	0	0	10	0.196078	41	0.803922	51	0.607843	51
Control	2017-11-07	0	0	31	0.62	19	0.38	50	-0.24	50	Retinal	2017-11-07	0	0	7	0.134615	45	0.865385	52	0.730769	52
Mean									-0.0596628											0.597575
Stde									0.62904											0.324869
s.e.m.									0.148266											0.0765723
n									18											18
	Genotype	Mean	Stde	s.e.m.	n
	Control	-0.0596628	0.62904	0.148266	18
	Retinal	0.597575	0.324869	0.0765723	18
		T-test
		0.000386017
	Control group significantly different from zero
	Experimental group significantly different from zero

## Sheet: Figure S1C 2
dTdc2-GAL4/UAS-ReaChR 800 lux 2s 40Hz 16s 8Hz 2s 0Hz
genotype 1	date	# out	%out	Yellow light	% yellow	Blue light	% blue	total	Index	total - #out	genotype 2	date	# out	%out	Yellow light	% yellow	Blue light	% blue	total	Index	total - #out
Control	2017-09-05	0	0	20	0.408163	29	0.591837	49	0.183673	49	Retinal	2017-09-05	0	0	19	0.387755	30	0.612245	49	0.22449	49
Control	2017-09-05	1	0.02	40	0.8	9	0.18	50	-0.632653	49	Retinal	2017-09-07	0	0	15	0.306122	34	0.693878	49	0.387755	49
Control	2017-09-07	0	0	15	0.283019	38	0.716981	53	0.433962	53	Retinal	2017-09-28	2	0.04	24	0.48	24	0.48	50	0	48
Control	2017-09-07	1	0.0188679	8	0.150943	44	0.830189	53	0.692308	52	Retinal	2017-10-02	0	0	16	0.355556	29	0.644444	45	0.288889	45
Control	2017-09-07	0	0	21	0.446809	26	0.553191	47	0.106383	47	Retinal	2017-10-09	1	0.0217391	32	0.695652	13	0.282609	46	-0.422222	45
Control	2017-09-28	0	0	9	0.183673	40	0.816327	49	0.632653	49	Retinal
Control	2017-09-28	0	0	13	0.270833	35	0.729167	48	0.458333	48	Retinal
Control	2017-09-28	0	0	16	0.340426	31	0.659574	47	0.319149	47	Retinal
Control	2017-10-02	0	0	14	0.27451	37	0.72549	51	0.45098	51	Retinal
Control	2017-10-02	0	0	19	0.395833	29	0.604167	48	0.208333	48	Retinal
Control	2017-10-02	0	0	22	0.431373	29	0.568627	51	0.137255	51	Retinal
Control	2017-10-09	1	0.0208333	10	0.208333	37	0.770833	48	0.574468	47	Retinal
Control	2017-10-09	2	0.04	35	0.7	13	0.26	50	-0.458333	48	Retinal
Control	2017-10-09	1	0.0212766	28	0.595745	18	0.382979	47	-0.217391	46	Retinal
Mean									0.206366											0.0957823
Stde									0.400177											0.322725
s.e.m.									0.106952											0.144327
n									14											5
	Genotype	Mean	Stde	s.e.m.	n
	Control	0.206366	0.400177	0.106952	14
	Retinal	0.0957823	0.322725	0.144327	5
		T-test
		0.587013
	Control group significantly different from zero
	Experimental group significantly different from zero
